1 **Molecular analysis of long non-coding RNA GAS5 and microRNA-34a**  
2 **expression signature in common solid tumors: A pilot study**

3 Eman A. Toraih<sup>1,2\*</sup>, Saleh Ali Alghamdi<sup>3</sup>, Aya El-Wazir<sup>1,2</sup>, Marwa M Hosny<sup>4</sup>, Mohammad H.  
4 Hussein<sup>5</sup>, Motaz S. Khashana<sup>6</sup>, Manal S. Fawzy<sup>4,7\*</sup>

5 <sup>1</sup> Genetics Unit, Department of Histology and Cell Biology, Faculty of Medicine, Suez Canal  
6 University, Ismailia, Egypt

7 <sup>2</sup>Center of Excellence of Molecular and Cellular Medicine, Suez Canal University, Ismailia, Egypt

8 <sup>3</sup>Medical Genetics, Clinical Laboratory Department, College of Applied Medical Sciences, Taif  
9 University, Taif, Saudi Arabia

10 <sup>4</sup>Department of Medical Biochemistry, Faculty of Medicine, Suez Canal University, Ismailia, Egypt

11 <sup>5</sup> Pulmonologist, Ministry of Health and Population, Cairo, Egypt

12 <sup>6</sup> Faculty of Medicine, Suez Canal University, Ismailia, Egypt

13 <sup>7</sup> Department of Biochemistry, Faculty of Medicine, Northern Border University, Arar, Saudi  
14 Arabia.

15 **\*Corresponding authors:**

16 E-mail: [manal2\\_khashana@ymail.com](mailto:manal2_khashana@ymail.com) (MSF)

17 E-mail: [emantoraih@gmail.com](mailto:emantoraih@gmail.com) (EAT)

18

19 **Short title:** LncRNA GAS5 and miR-34a expression in cancer

20

21

22

23

24

25

26

27 **Abstract**

28 Accumulating evidence indicates that non-coding RNAs including microRNAs (miRs) and long  
29 non-coding RNAs (lncRNAs) are aberrantly expressed in cancer, providing promising biomarkers  
30 for diagnosis, prognosis and/or therapeutic targets. We aimed in the current work to quantify the  
31 expression profile of miR-34a and one of its bioinformatically selected partner lncRNA growth  
32 arrest-specific 5 (*GAS5*) in a sample of Egyptian cancer patients, including three prevalent types of  
33 cancer in our region; renal cell carcinoma (RCC), hepatocellular carcinoma (HCC) and  
34 glioblastoma (GB) as well as to correlate these expression profiles with the available  
35 clinicopathological data in an attempt to clarify their roles in cancer. Quantitative real-time  
36 polymerase chain reaction analysis was applied. Different bioinformatics databases were searched  
37 to confirm the potential miRNAs-lncRNA interactions of the selected ncRNAs in cancer  
38 pathogenesis. *GAS5* was significantly under-expressed in the three types of cancer. However, levels  
39 of miR-34a greatly varied according to the tumor type; it displayed an increased expression in RCC  
40 [4.05 (1.003-22.69),  $p < 0.001$ ] and a decreased expression in GB [0.35 (0.04-0.95),  $p < 0.001$ ]. A  
41 weak negative correlation was observed between levels of *GAS5* and miR-34a in GB [ $r = -0.39$ ,  $p$   
42  $= 0.006$ ]. Univariate analyses revealed a correlation of *GAS5* downregulation with poor disease-  
43 free survival ( $r = 0.31$ ,  $p = 0.018$ ) and overall survival ( $r = 0.28$ ,  $p = 0.029$ ) in RCC but not in GB,  
44 and a marginal significance correlation with a higher number of lesions in HCC. Hierarchical  
45 clustering analysis showed RCC patients among others, could be clustered by *GAS5* and miR-34a  
46 co-expression profile. Our results confirm the tumor suppressor role of *GAS5* in cancer and suggest  
47 its potential applicability to be a predictor of bad outcomes with other conventional markers for  
48 various types of cancer. Further functional validation studies are warranted to confirm miR-  
49 34a/*GAS5* interplay in cancer.

50

51 **Keywords:** *GAS5*; miR-34a; RCC; GB; HCC

52

## 53 **Introduction**

54 Cancer is now the second leading cause of mortality worldwide, causing 8.8 million deaths globally  
55 in 2015, which is equivalent to one in every six deaths [1]. Cancer occurs as a net result of  
56 activation of oncogenes and inhibition of tumor suppressor genes (TSGs) [2]. Decades back, it was  
57 believed that oncogenes and TSGs had to code for proteins, and only mutations in protein-coding  
58 genes would result in such pathological conditions as cancer. However, in the world of genetics, it  
59 is never that simple. With the advancement of genetic technologies including next generation  
60 sequencing, microarrays and bioinformatic machinery, many truths came to light, including what  
61 was originally thought to be junk DNA is now found to code for thousands of equally significant  
62 regulatory RNAs [3]. Since their discovery, the non-coding RNAs (ncRNAs) have been recognized  
63 as epigenetic regulators of protein-coding genes. Recently, a whole new level of regulation has been  
64 uncovered, when it was found that ncRNAs have the ability to regulate each other as well [4]  
65 further adding to the complexity of the regulatory processes. This set of findings has revolutionized  
66 our understanding of several human diseases, making this ‘the era of non-coding RNAs’.

67 Many classes of ncRNAs have been identified and linked to cancer, the most common of which are  
68 micro RNAs (miRNAs), long-noncoding RNAs (lncRNAs), PIWI-interacting RNAs (piRNAs) and  
69 small nucleolar RNAs (snoRNAs). The roles of these four types of ncRNAs in cancer are reviewed  
70 in several studies [5-8]. In brief, overexpression of some ncRNAs as miRNAs or lncRNAs can  
71 suppress the expression of TSG targets, while loss of function or reduced expression of others may  
72 allow overexpression of the oncogenes they regulate. Furthermore, since each ncRNA may regulate  
73 hundreds of different genes, its over or under expression may have widespread oncogenic effects  
74 because many genes will be dysregulated [9].

75 Here we were interested in a relatively newly discovered lncRNA; Growth Arrest Specific 5  
76 (GAS5) which is a poorly conserved gene mapped to chromosome 1q25.1 [10]. It consists of 12  
77 exons and 11 introns from which 29 transcripts are produced from alternative splicing, many of  
78 which contain retained introns (Ensembl Genome Browser 'GAS5'). The first two transcripts

79 discovered (produced from alternative splice sites on exon 7) are the GAS5a and GAS5b with the  
80 latter being predominantly expressed in most cells [11]. Another synonym for the gene is ' Small  
81 Nucleolar RNA Host Gene', this is for having the ability to produce multiple (10 in human) non-  
82 coding small nucleolar RNAs (snRNAs) from its more conserved introns [11]. These snRNAs are  
83 involved in the regulation of ribosomal RNA (rRNA) synthesis through 2-O-methylation of pre-  
84 ribosomal RNA [12].

85 As its name implies, GAS5 is over expressed in growth-arrested cells [13]. This is further  
86 demonstrated by the presence of high levels of GAS5 in brain cells, which are considered the  
87 slowest dividing cells in the body as opposed to its lowest levels in other rapidly dividing cells, the  
88 most important of which are cancer cells [14].

89 Expectedly, GAS5 under expression was found to be associated with multiple types of cancer [15-  
90 25] and it was found to bind some miRNAs, including miR-21, miR-222 and miR-103 sponging  
91 their inhibitory effect on their target TSGs ([16, 21, 26, 27].

92 Our bioinformatic analyses have revealed a potential new miRNA target for the GAS5 gene; miR-  
93 34a. This miRNA is encoded from chromosome1p36.22. Its promotor is recognized for having  
94 multiple CpG islands and a p53 binding site, making p53 a direct transcriptional regulator for this  
95 miRNA [28, 29]. While the history of miR-34a with cancer is very well established, studies  
96 conducted on different types of cancers have contradictory results regarding its actual role in tumor  
97 progression. In other words, is it an oncogene or a TSG? Many studies have proved it's functioning  
98 as a TSG in various types of cancer, including neuroblastoma [30], leukemia [31], pancreatic [32]  
99 and hepatocellular [33, 34] carcinoma, glioblastoma (GB) [35, 36], breast [37] lung [38] and colon  
100 [39] cancer. On the contrary, other studies have found that it functions as an oncogene through  
101 promoting tumorigenesis as in RCC [40, 41], papillary thyroid carcinoma (PTC) [42], colon [39]  
102 and uterine cancer [43]. It has been suggested that this discrepancy may be attributed to the tissue  
103 type and the miR-34a/p53 pathway involved [41].

104 To the best of our knowledge, no clinical studies were conducted to explore both GAS5 and miR-

105 34a profiles in cancer patients. Hence, we were interested to investigate the expression profiles of  
106 these ncRNAs in three prevalent types of cancer in our region; renal cell carcinoma (RCC),  
107 hepatocellular carcinoma (HCC) and glioblastoma (GB) as well as to correlate these expression  
108 profiles with the available clinicopathological data in an attempt to clarify their roles in cancer.

## 109 **Materials and Methods**

### 110 **Genomic characterization of GAS5 and miR-34a**

111 Chromosomal localization, genomic sequence and structure analysis, subcellular localization,  
112 variant analysis, and folding pattern were retrieved from different online tools; including Ensembl  
113 (<http://www.ensembl.org/>), GeneCards for human gene database (<http://www.genecards.org/>),  
114 National Center for Biotechnology Information (NCBI) ([ncbi.nlm.nih.gov/](http://ncbi.nlm.nih.gov/)), COMPARTMENTS  
115 subcellular localization (<https://compartments.jensenlab.org/Search>), Database of Transcription  
116 Start Sites (DBTSS) version 10.0 (<http://dbtss.hgc.jp/>), KineFold (<http://kinfold.curie.fr/>), and  
117 MFold webserver (<http://unafold.rna.albany.edu/?q=mfold/RNA-Folding-Form>).

### 118 **Exploring miR-34 and GAS5 interactions**

119 Identifying complementary regions between microRNA-34a and lncRNA GAS5 were demonstrated  
120 by several tools; RNA22 microRNA target detection (<https://cm.jefferson.edu/rna22/>) and DIANA-  
121 LncBase v2 (<http://diana.imis.athena-innovation.gr/DianaTools/index.php>).

### 122 **Functional enrichment analysis**

123 Pathway enrichment analysis and gene ontology of microRNA-34a was performed by Diana-  
124 miRPath v3.0 (<http://diana.imis.athena-innovation.gr/DianaTools/index.php>) using its  
125 experimentally validated gene targets. Functional enrichment analysis of GAS5 was obtained from  
126 Ensembl and GeneCards databases to identify its biological function in cancer.

### 127 **Study population and sampling collection**

128 In total, 230 samples were analyzed, including 60 formalin-fixed, paraffin-embedded (FFPE) RCC  
129 samples and their paired adjacent non-cancer tissues, 50 FFPE GB specimens and 10 non-cancer  
130 brain tissues as well as 30 HCC blood samples and 20 controls.

131        **(a) RCC cohort**

132        The archived FFPE renal samples were taken from sixty patients who underwent radical  
133        nephrectomy for a primary RCC and dating back for three years. All retrieved cases were archived  
134        in the Pathology laboratory of Mansoura Oncology Center, Mansoura, Egypt. No history of  
135        receiving neoadjuvant chemotherapy or radiotherapy prior to sampling. Clinicopathological data,  
136        including the survival were collected from patient medical records. Paired sixty cancer-free adjacent  
137        tissues were examined and sectioned to serve as controls for molecular analysis.

138        **(b) GB cohort**

139        Fifty glioblastoma patients and 10 non-cancer brain tissues collected from the archive of the  
140        Pathology Department, Mansoura University Hospitals, Egypt, dating back for three years were  
141        included in the current work. Detailed patients' data were retrieved from their follow up records.  
142        They had GB grade 4, undergone surgical removal and had not received any treatment before  
143        sampling. They followed-up for more than 3 years.

144        **(c) HCC cohort**

145        Following our local hospital and medical ethical committee rules in liver tissue sampling  
146        prohibition from HCC patients, only blood samples were available. Thirty HCV-induced HCC and  
147        20 matched controls from healthy blood bank donors were recruited in the study. Patients were  
148        obtained from the outpatient clinic of Tropical Medicine and Gastroenterology Department, Faculty  
149        of Medicine, Assuit, Egypt. They had typical imaging findings of liver cancer and elevated alpha  
150        fetoprotein (AFP). Patients underwent clinical and radiological assessment, confirmation of HCV  
151        by PCR, Barcelona-Clinic Liver Cancer (BCLC) staging, and Child-Turcotte-Pugh (CTP) scoring  
152        (44). Survival data for HCC patients were not available in patients' medical records. Hence, these  
153        data were not included in the statistical analysis for HCC patients.

154        **Ethical approval**

155        The study was conducted according to the ethical guidelines of the Declaration of Helsinki and  
156        approved by the Medical Research Ethics Committee of Suez Canal University.

157 **RNA extraction**

158 Total RNA; including the small RNA, was isolated from either FFPE tissue sections (5 to 8- $\mu$ m-  
159 thick) using the Qiagen miRNeasy FFPE Kit (*Qiagen, cat no 217504*) or serum using Qiagen  
160 miRNeasy serum/plasma Kit (*Qiagen, cat no 217184*) following the protocols supplied by the  
161 manufacturer. Concentration of RNA was determined using the NanoDrop ND-1000  
162 spectrophotometer (*NanoDrop Tech., Inc. Wilmington, DE, USA*). Samples with a 260/280 nm  
163 absorbance ratio less than 1.8 were excluded.

164 **Reverse transcription reaction**

165 Subsequently, RNA for lncRNA GAS5 was converted to complementary DNA (cDNA) in a T-  
166 Professional Basic, Biometra PCR System (*Biometra, Goettingen, Germany*) using high Capacity  
167 cDNA Reverse Transcription Kit (*Applied Biosystems, P/N 4368814*) with RT random primers as  
168 previously described [45].

169 Reverse transcription of miR-34a was specifically converted to cDNA using TaqMan<sup>TM</sup> MicroRNA  
170 Reverse Transcription kit (*P/N 4366596; Applied Biosystems, Foster City, CA, USA*) with 5x  
171 miRNA specific stem-loop primers as previously described in our prior publication [46].  
172 Appropriate controls were included in each experiment.

173 **LncRNA GAS5 and microRNA-34a expression analyses**

174 The Real-Time PCR reactions were performed in accordance with the Minimum Information for  
175 Publication of Quantitative Real-Time PCR Experiments (MIQE) guidelines [47]. The expression  
176 level of *GAS5* was assessed via SYBR Green qPCR analysis and normalized with GAPDH. The  
177 following primers were designed using Primer 3 software and checked by *in silico* PCR  
178 amplification of the University of California, Santa Cruz (UCSC) genome browser; for *GAS5*:  
179 Forward: 5'- CTTGCCTGGACCAGCTTAAT-3'; Reverse: 5'-CAAGCCGACTCTCCATACCT-  
180 3', and for *GAPDH*: Forward: 5'- CGGATTTGGTCGTATTGGG-3'; Reverse: 5'-  
181 CTGGAAGATGGTGTGATGGGATT-3'. In brief, 10  $\mu$ l of qPCR Green Master (*Jena Bioscience,*  
182 *Cat no. PCR-313L*), 0.6  $\mu$ l (10  $\mu$ M) forward and reverse primers, 8  $\mu$ l PCR grade water, and 1  $\mu$ l

183 cDNA template were included in the reaction for *GAS5* and *GAPDH* SYBR Green assay  
184 analyses [46]. For microRNA quantification, a final volume of 20  $\mu$ l was adjusted in duplicate,  
185 including 1.33  $\mu$ l specific RT products, 2 $\times$  TaqMan<sup>®</sup> Universal PCR Master Mix with UNG  
186 (Applied Biosystems, P/N 4440043), and 20 $\times$  of 1  $\mu$ l specific TaqMan<sup>®</sup> RNA assay for hsa-miR-  
187 34a-5p (Applied Biosystems, assay ID 000426) and Taqman<sup>®</sup> Universal PCR master mix II, No  
188 UNG (2 $\times$ ) [48]. Two endogenous control assays were used; TATA box binding protein (TBP; assay  
189 ID Hs00427620\_m1) in brain cancer and RNU6B (assay ID Hs001093) in liver and renal cancer  
190 [49, 50]. Appropriate negative and positive controls were used. The PCR for 96-well plates was  
191 carried out using StepOne<sup>™</sup> Real-Time PCR System (Applied Biosystem) and incubated as  
192 follows: 95 $^{\circ}$ C for 10 min followed by 45 cycles of 92 $^{\circ}$ C for 15 seconds and 60 $^{\circ}$ C for 1 minute. Ten  
193 percent randomly selected study samples were re-evaluated in separate runs for the study gene  
194 expressions to test the reproducibility of the qPCR which showed very close quantitative cycles  
195 value results and low standard deviations.

## 196 **Statistical analysis**

197 R package (version 3.3.2) and Statistical Package for the Social Sciences (SPSS) for Windows  
198 software (version 22.0) were used for data analyses. Categorical variables were compared using  
199 the Chi-square ( $\chi^2$ ) or Fisher's exact tests where appropriate. Wilcoxon matched-pair signed-rank  
200 and Mann-Whitney U tests were used for tissues of renal/brain cancer and serum of liver cancer  
201 patients, respectively, to compare continuous variables. The correlation between miR-34a level  
202 and *GAS5* expressions was calculated by Spearman's rank correlation analysis. A two-tailed *p*-  
203 value of < 0.05 was considered statistically significant. The receiver operating characteristic (ROC)  
204 curves were performed to get the best cutoff values of miRNA-34a for discriminating long and  
205 short survivors in cancer patients. The fold change of ncRNAs expressions in each patient relative  
206 to the control was calculated via Livak method based on the quantitative cycle ( $C_q$ ) values with the  
207 following equation: relative quantity =  $2^{-\Delta\Delta C_q}$ ; where  $\Delta\Delta C_q = (C_q \text{ ncRNA} - C_q \text{ internal control})_{\text{cancer}}$   
208  $- (C_q \text{ ncRNA} - C_q \text{ internal control})_{\text{control}}$  [51]. Univariate analysis for association between ncRNA



209 expression profile and clinico-pathological features in cancer patients was run. The software  
210 package named PC-ORD ver. 6 [52] was employed to run different multivariate analyses for  
211 clustering analysis of patients according to clinico-pathological and molecular data.

## 212 **Results**

### 213 **Genomic location of GAS5**

214 Lnc-RNA GAS5 is also known as small nucleolar RNA host gene 2 (SNHG2) and non-protein  
215 coding RNA 30 (NCRNA00030). It is encoded by GAS5 gene on chromosome 1q25.1 (Genomic  
216 coordination at 1:173863901-173867987 at the negative strand according to human genome  
217 assembly GRCh38) (**Fig. 1A**). It consists of 12 exons, spanning 4.087 kb and encoding for 29  
218 different alternative splice transcripts ranging in length from 242 to 1698 bp (Electronic  
219 Supplementary Table S1).

### 220 **Sequence analysis of GAS5**

221 *GAS5* gene contains a seven-nucleotide oligo-pyrimidine tract on its 5'-end in exon 1, hence is  
222 classified as a member of the 5' terminal oligo-pyrimidine (TOP) genes. This sequence can act as a  
223 cis-regulatory motif which either inhibits the binding of translational regulatory proteins  
224 downstream to the transcriptional start sites of mRNAs or suppresses the translational machinery  
225 itself. In addition to its translational controls, the TOP elements are known to modulate gene  
226 expression through regulating transcription [53]. Being one of the TOP genes, it is ubiquitously  
227 expressed and is predicted to regulate the translation of more than 20% of total mRNAs [DataBase  
228 of Transcription Start Sites]

229 Sequence analysis of *GAS5* gene revealed that it is a small nucleolar RNA host gene, containing  
230 multiple *snoRNA* genes within its introns. These genes encode for ten C/D box snoRNAs, which  
231 contain the C (UGAUGA) and D (CUGA) box motifs. They are predicted to play a role in the 2'-O-  
232 methylation of rRNA by guiding guanine methylation, which enhances RNA folding and  
233 interaction with ribosomal proteins. *GAS5* also hosts SNORDA103 within intron 4, an H/ACA box  
234 snoRNA, which is associated with pseudouridylation (**Fig. 1B**).

## 235 **Variant analysis**

236 *GAS5* gene is shown to be highly polymorphic, enclosing around 300 thousand variants (75%  
237 intronic, 21% exonic, and 4% splice region polymorphisms). Among all these polymorphisms, 14  
238 SNPs, one deletion and one insertion are common variants with minor allele frequency (MAF) >  
239 0.05 (**Fig. 1C**) and (Electronic Supplementary Table S2).

240

241 **Fig. 1 Structural analysis of *GAS5* gene.** (A) Chromosomal localization of *GAS5* gene. It is  
242 present on chromosome 1q25.1, at genomic coordination 1:173863901-173867987 on the negative  
243 strand (according to human genome assembly GRCh38). (B) Sequence analysis of *GAS5* gene. It  
244 consists of 12 exons, spanning 4.087 kb that code for 29 different alternative splice transcripts. It  
245 hosts multiple snoRNA genes within its introns (except intron 9). These genes encode for ten C/D  
246 box snoRNAs, which contain the C (UGAUGA) and D (CUGA) box motifs, and an H/ACA box  
247 snoRNA, SNORDA103, within intron 4. (C) Genetic variant analysis. *GAS5* gene (4087 bases long)  
248 contains around 300 thousand variants (75% intronic, 21% exonic, and 4% splice region  
249 polymorphisms). Among all these polymorphisms, 14 SNPs (red), one deletion (green) and one  
250 insertion (blue) are common variants with minor allele frequency (MAF) > 0.05. (D) Subcellular  
251 localization of lncRNA *GAS5*. Text mining highlighted its predominant existence intranuclear and  
252 within extracellular exosomes which are extruded into the circulation. (F) Folding pattern of  
253 lncRNA *GAS5*. [Data source: Ensembl.org, genecards.org, NCBI, COMPARTMENT database, and  
254 MFold]

255

## 256 ***GAS5*-miRNA interaction**

257 Analysis with the RNA22 program (<http://cbcsrv.watson.ibm.com/rna22.html>) identified  
258 complementary regions of *GAS5* with 690 microRNAs. Among these putative microRNAs, only  
259 252 interactions with 234 microRNAs showed significant binding ( $p < 0.05$ ) (Electronic  
260 Supplementary Table S3). Via DIANA-LncBase v2 database for experimentally validated miRNA-

261 lncRNA interactions, GAS5 was identified as a miR-34a target by immunoprecipitation  
262 experiments (score=0.558). For further confirmation, we used RNA22 software to determine the  
263 interaction binding sites between GAS5 transcripts and miR-34a. Our results showed base-pairing  
264 in twenty-three alternative splice variants. Among them, nine transcripts had two miR-34a binding  
265 sites (Electronic Supplementary Table S4).

### 266 **miR-34a functional analysis**

267 Hundreds of miR-34a-5p and 3p targets were retrieved from various online databases; including  
268 miRTarBase (<http://mirtarbase.mbc.nctu.edu.tw/>), miRDB (<http://mirdb.org/>) and microRNA.org.  
269 Functional enrichment analysis revealed its enrollment in cancer-related KEGG pathways, as  
270 Pathways in cancer (hsa05200, 115 targets,  $p=0.001723304$ ), proteoglycans in cancer (hsa05205, 71  
271 targets,  $p=1.687731e-06$ ), adherens junction (hsa04520, 34 targets,  $p = 3.396929e-06$ ), cell cycle  
272 (hsa04110, 54 targets,  $p = 3.355808e-05$ ), and p53 signaling pathway (hsa04115, 31 targets,  $p =$   
273  $0.006060223$ ) as well as cancer-specific pathways, namely glioma (hsa05214, 29 targets,  $p =$   
274  $0.0003111577$ ) and renal cell carcinoma (hsa05211, 28 targets,  $p= 0.02521455$ ) (Electronic  
275 Supplementary Table S5). GO analysis (Diana tools) demonstrated miR-34a to be involved in cell  
276 death, cell cycle, and response to stress thus highlighting its role in cancer cell growth. In addition,  
277 miR-34a was significantly associated with membrane organization, cell junction organization, and  
278 cell motility, hence may play a key role in cancer cell invasion and metastasis (**Fig. 2**).

279

280 **Fig. 2 Functional and structural analysis of miR-34a.** (A) GAS5: miR-34a-5p interaction.  
281 Complementarity regions are shown in three binding sites in *GAS5* gene, one proximal at 5' region  
282 (1432-1455) and two distal at 3' end (3545-3567 and 3698-3719) [Data source: RNA22, DIANA-  
283 LncBase v2]. (B) Predicted secondary structure of miR-34a. Folding pattern and energy are  
284 demonstrated [Data source: KineFold]. (C) Functional enrichment analysis of miR-34a  
285 experimentally validated gene targets. Significant clustered heat map represents the gene ontology  
286 using GO slim option, FDR conservative states,  $p$  value threshold  $< 0.05$ , and categories union

287 [Data source: DIANA-miRPath v3]. <http://snf-515788.vm.oceanos.grnet.gr/uploads/R/HeatMap290913.png>

289

## 290 Characteristics of the study population

291 Baseline characteristics of RCC, GB, and HCC cohorts are demonstrated in **Tables 1 to 3**.

292 **Table 1. Clinicopathological characteristics of renal cell carcinoma patients**

293

| Variables             | Total     | Low OS    | High OS   | <i>p</i> value   |
|-----------------------|-----------|-----------|-----------|------------------|
| <b>Total number</b>   | 60 (100)  | 19 (31.7) | 41 (68.3) |                  |
| <b>Age</b>            |           |           |           |                  |
| ≤55 years             | 6 (10.0)  | 3 (15.8)  | 3 (7.3)   | 0.370            |
| >55 years             | 54 (90.0) | 16 (84.2) | 38 (92.7) |                  |
| <b>Gender</b>         |           |           |           |                  |
| Female                | 21 (35.0) | 9 (47.4)  | 1 (29.3)  | 0.245            |
| Male                  | 39 (65.0) | 10 (52.6) | 29 (70.7) |                  |
| <b>HPD</b>            |           |           |           |                  |
| Clear cell            | 30 (50.0) | 8 (42.1)  | 22 (53.7) | 0.354            |
| Papillary             | 15 (25.0) | 4 (21.1)  | 11 (26.8) |                  |
| Chromophobic          | 15 (25.0) | 7 (36.8)  | 8 (19.5)  |                  |
| <b>Tumor location</b> |           |           |           |                  |
| Right side            | 22 (36.7) | 7 (36.8)  | 15 (36.6) | 0.985            |
| Left side             | 38 (63.3) | 12 (63.2) | 26 (63.4) |                  |
| <b>Grade</b>          |           |           |           |                  |
| Grade 1               | 9 (15.0)  | 1 (5.3)   | 8 (19.5)  | <b>0.023</b>     |
| Grade 2               | 28 (46.7) | 6 (31.6)  | 22 (53.7) |                  |
| Grade 3               | 23 (38.3) | 12 (63.2) | 11 (26.8) |                  |
| <b>Tumor size</b>     |           |           |           |                  |
| T1                    | 21 (35.0) | 6 (31.6)  | 15 (36.6) | 0.589            |
| T2                    | 25 (41.7) | 7 (16.8)  | 18 (43.9) |                  |
| T3                    | 14 (23.3) | 6 (31.6)  | 8 (19.5)  |                  |
| <b>LN</b>             |           |           |           |                  |
| Negative              | 39 (65.0) | 11 (57.9) | 28 (68.3) | 0.562            |
| Positive              | 21 (35.0) | 8 (42.1)  | 13 (31.7) |                  |
| <b>Recurrence</b>     |           |           |           |                  |
| Negative              | 44 (73.3) | 7 (36.8)  | 37 (90.2) | <b>&lt;0.001</b> |
| Positive              | 16 (26.7) | 12 (63.2) | 4 (9.8)   |                  |
| <b>DFS</b>            |           |           |           |                  |
| ≤ 1year               | 29 (48.3) | 19 (100)  | 10 (24.4) | <b>&lt;0.001</b> |
| > 1year               | 31 (51.7) | 0 (0.0)   | 31 (75.6) |                  |
| <b>GAS5 fold</b>      |           |           |           |                  |
| ≤ 1-fold              | 55 (91.7) | 19 (100)  | 36 (87.8) | 0.283            |
| > 1-fold              | 3 (5.0)   | 0 (0.0)   | 3 (7.3)   |                  |
| >10-folds             | 2 (3.3)   | 0 (0.0)   | 2 (4.9)   |                  |

| <b>miR-34a fold</b> |           |          |           |       |
|---------------------|-----------|----------|-----------|-------|
| ≤ 1-fold            | 15 (25.0) | 6 (31.6) | 9 (22.0)  | 0.192 |
| > 1-fold            | 19 (31.7) | 8 (42.1) | 11 (26.8) |       |
| >10-folds           | 26 (43.3) | 5 (26.3) | 21 (51.2) |       |

294 *HPD* histopathological diagnosis, *DFS* disease-free survival, *OS* overall survival. Low OS: ≤12  
 295 months, High OS: >12 months. Fisher's Exact and Pearson Chi-square tests were used. Bold values  
 296 indicate statistical significance at  $p < 0.05$

297

298 **Table 2. Clinicopathological characteristics of glioblastoma patients**

| <b>Variables</b>      | <b>Total</b> | <b>Low OS</b> | <b>High OS</b> | <b><i>p</i> value</b> |
|-----------------------|--------------|---------------|----------------|-----------------------|
| <b>Total number</b>   | 50 (100)     | 10 (20.0)     | 40 (80.0)      |                       |
| <b>Age</b>            |              |               |                |                       |
| ≤55 years             | 21 (42.0)    | 7 (70.0)      | 14 (35.0)      | 0.073                 |
| >55 years             | 29 (58.0)    | 3 (3.0)       | 26 (65.0)      |                       |
| <b>Gender</b>         |              |               |                |                       |
| Female                | 13 (26.0)    | 1 (10.0)      | 12 (30.0)      | 0.258                 |
| Male                  | 37 (74.0)    | 9 (90.0)      | 28 (70.0)      |                       |
| <b>Tumor location</b> |              |               |                |                       |
| Frontal               | 24 (48.0)    | 8 (80.0)      | 16 (40.0)      | 0.071                 |
| Temporo-paroetal      | 18 (36.0)    | 1 (10.0)      | 17 (42.5)      |                       |
| Fronto-temporal       | 8 (16.0)     | 1 (10.0)      | 7 (17.5)       |                       |
| <b>Recurrence</b>     |              |               |                |                       |
| Negative              | 44 (88.0)    | 8 (80.0)      | 36 (90.0)      | 0.586                 |
| Positive              | 6 (12.0)     | 2 (20.0)      | 4 (10.0)       |                       |
| <b>DFS</b>            |              |               |                |                       |
| ≤ 1year               | 25 (50.0)    | 10 (100)      | 15 (37.5)      | <b>0.001</b>          |
| > 1year               | 25 (50.0)    | 0 (0.0)       | 25 (62.5)      |                       |
| <b>GAS5 fold</b>      |              |               |                |                       |
| ≤ 1-fold              | 37 (74.0)    | 7 (70.0)      | 30 (75.0)      | 0.707                 |
| > 1-fold              | 13 (26.0)    | 3 (30.0)      | 10 (25.0)      |                       |
| >10-folds             |              |               |                |                       |
| <b>miR-34a fold</b>   |              |               |                |                       |
| ≤ 1-fold              | 38 (76.0)    | 8 (80.0)      | 30 (75.0)      | 0.741                 |
| > 1-fold              | 12 (24.0)    | 2 (20.0)      | 10 (25.0)      |                       |
| >10-folds             | 0 (0.0)      |               |                |                       |

299 Data are presented as number (frequency). *HPD* histopathological diagnosis, *DFS* disease-free  
 300 survival, *OS* overall survival. Low OS: ≤12 months, High OS: >12 months. Fisher's Exact and  
 301 Pearson Chi-square tests were used. Bold values indicate statistical significance at  $p < 0.05$

302 **Table 3. Clinicopathological characteristics of hepatocellular carcinoma patients**

| Variables                | Patients (n=30) |
|--------------------------|-----------------|
| <b>Total number</b>      |                 |
| <b>Age</b>               |                 |
| ≤55 years                | 13 (43.3)       |
| >55 years                | 17 (56.7)       |
| <b>Gender</b>            |                 |
| Female                   | 11 (36.7)       |
| Male                     | 19 (63.3)       |
| <b>Tumor size</b>        |                 |
| <5 cm                    | 9 (30.0)        |
| ≥5 cm                    | 21 (70.0)       |
| <b>Number of lesions</b> |                 |
| Solitary                 | 20 (66.7)       |
| Multiple                 | 10 (33.3)       |
| <b>LCF score</b>         | 9.7±1.2         |
| <b>CTP class</b>         |                 |
| Child B                  | 21 (70.0)       |
| Child C                  | 9 (30.0)        |
| <b>Hepatomegaly</b>      |                 |
| Mild                     | 18 (60.0)       |
| Massive                  | 12 (40.0)       |
| <b>Treatment</b>         |                 |
| Ablation                 | 15 (30.0)       |
| Radiofrequency           | 11 (36.7)       |
| Supportive               | 4 (13.3)        |
| <b>GAS5 fold</b>         |                 |
| ≤ 1-fold                 | 27 (90.0)       |
| > 1-fold                 | 3 (10.0)        |
| <b>miR-34a fold</b>      |                 |
| ≤ 1-fold                 | 19 (63.3)       |
| > 1-fold                 | 10 (33.3)       |

303 Data are presented as number (frequency). *CTP* Child-Turcotte-Pugh classification for liver cell  
 304 failure, *LCF* liver cell failure score by *CTP* classification. Fisher's Exact and Pearson Chi-square  
 305 tests were used.

306

### 307 **Expression profiling**

308 GAS5 levels were under-expressed in RCC [0.08 (0.006-0.38),  $p < 0.001$ ], GB [0.10 (0.003-0.89),  $p$   
 309  $< 0.001$ ] and HCC [0.12 (0.015-0.74),  $p < 0.001$ ]. On the other hand, miR-34a displayed an  
 310 increased expression in RCC [4.05 (1.003-22.69),  $p < 0.001$ ] and a decreased expression in GB  
 311 [0.35 (0.04-0.95),  $p < 0.001$ ] as depicted in **Fig. 3**. A weak negative correlation was observed  
 312 between levels of GAS5 and miR-34a in GB [ $r = -0.39$ ,  $p = 0.006$ ] (**Fig. 4**).

313

314 **Fig. 3 Relative expression of GAS5 and miR-34a-5p in cancer.** *RCC* renal cell carcinoma, *GB*  
315 glioblastoma, *HCC* hepatocellular carcinoma. Data are represented as medians. The box defines  
316 upper and lower quartiles (25% and 75%, respectively) and the error bars indicate upper and  
317 lower adjacent limits. Expression levels in cancer and control samples were normalized to  
318 GAPDH in RCC and HCC, TBP in GB and RNU6B for microRNA and calculated using the  
319 delta-delta CT method [ $= 2^{-\Delta\Delta CT}$ ] in comparison to controls. Fold change of controls were  
320 set at 1.0. Wilcoxon matched-pair signed-rank and Mann-Whitney U tests were used for tissues  
321 of renal/brain cancer and serum of liver cancer patients, respectively. Two-sided  $p < 0.05$  was  
322 considered statistically significant

323

324 **Fig. 4 Correlation between GAS5 and miR-34a-5p expression levels.** *RCC* renal cell carcinoma,  
325 *GB* glioblastoma, *HCC* hepatocellular carcinoma. Spearman's rank correlation test was used.  
326 Statistical significance was considered at  $p < 0.05$ .

327

#### 328 **Association of GAS5 and miR-34a with clinicopathological features**

329 Univariate analyses are shown in **Table 4A**, B, and C. The lower GAS5 level was correlated  
330 with poor DFS ( $r = 0.31$ ,  $p = 0.018$ ) and OS ( $r = 0.28$ ,  $p = 0.029$ ) in RCC but not in GB, and was  
331 correlated by a marginal significance ( $r = -0.35$ ,  $p = 0.056$ ) with a higher number of lesions in  
332 HCC. Levels of miR-34a did not correlate with any clinico-pathological features.

333

334

335

336

337

338

339 **Table 4. Univariate analysis for association between gene profile and clinico-pathological**  
 340 **features in the study cohorts**

|                          | <b>(a) RCC</b>          |                                       |                         |                                       |
|--------------------------|-------------------------|---------------------------------------|-------------------------|---------------------------------------|
|                          | <b>GAS5</b>             |                                       | <b>miR-34a</b>          |                                       |
|                          | <i>p</i> <sub>ass</sub> | <i>r</i> ( <i>p</i> <sub>corr</sub> ) | <i>p</i> <sub>ass</sub> | <i>r</i> ( <i>p</i> <sub>corr</sub> ) |
| <b>Age</b>               | 0.239                   | -0.069 (0.598)                        | 0.352                   | -0.066 (0.619)                        |
| <b>Gender</b>            | 0.631                   | 0.063 (0.635)                         | 0.798                   | -0.033(0.801)                         |
| <b>Location</b>          | 0.908                   | -0.015 (0.910)                        | 0.884                   | 0.019 (0.886)                         |
| <b>HPD</b>               | 0.257                   | 0.191 (0.143)                         | 0.504                   | -0.130(0.321)                         |
| <b>Grade</b>             | 0.402                   | 0.171 (0.192)                         | 0.378                   | -0.167 (0.204)                        |
| <b>Tumor size</b>        | 0.199                   | 0.157 (0.230)                         | 0.361                   | -0.152 (0.246)                        |
| <b>LN</b>                | 0.193                   | 0.169 (0.195)                         | 0.258                   | -0.147(0.261)                         |
| <b>Recurrence</b>        | 0.192                   | 0.170 (0.195)                         | 0.371                   | -0.116 (0.376)                        |
| <b>DFS</b>               | 0.120                   | <b>0.305 (0.018)</b>                  | 0.363                   | 0.215 (0.099)                         |
| <b>OS</b>                | 0.266                   | <b>0.283 (0.029)</b>                  | 0.441                   | 0.191 (0.144)                         |
|                          | <b>(b) GBM</b>          |                                       |                         |                                       |
| <b>Age</b>               | 0.883                   | 0.063 (0.663)                         | 0.930                   | -0.013 (0.931)                        |
| <b>Gender</b>            | 0.921                   | -0.014 (0.922)                        | 0.514                   | -0.093 (0.520)                        |
| <b>Location</b>          | 0.530                   | -0.150 (0.300)                        | 0.711                   | 0.091 (0.531)                         |
| <b>Recurrence</b>        | 0.258                   | 0.166 (0.248)                         | 0.070                   | -0.260 (0.068)                        |
| <b>DFS</b>               | 0.869                   | 0.012 (0.936)                         | 0.677                   | 0.074 (0.609)                         |
| <b>OS</b>                | 0.451                   | 0.48 (0.743)                          | 0.356                   | 0.013 (0.927)                         |
|                          | <b>(c) HCC</b>          |                                       |                         |                                       |
| <b>Age</b>               | 0.869                   | -0.037 (0.848)                        | 0.059                   | -0.289 (0.121)                        |
| <b>Gender</b>            | 0.553                   | 0.112 (0.556)                         | 0.420                   | 0.156 (0.411)                         |
| <b>Hepatomegaly</b>      | 0.692                   | -0.079 (0.680)                        | 0.851                   | 0.039 (0.837)                         |
| <b>Tumor size</b>        | 0.226                   | 0.278 (0.137)                         | 0.209                   | -0.315 (0.090)                        |
| <b>Number of lesions</b> | 0.193                   | -0.352 (0.056)                        | 0.916                   | 0.112 (0.225)                         |
| <b>CTP class</b>         | 0.283                   | -0.206 (0.275)                        | 0.533                   | 0.122 (0.521)                         |
| <b>Treatment</b>         | 0.715                   | 0.144 (0.447)                         | 0.598                   | 0.006 (0.973)                         |

341 *p*<sub>ass</sub> *p* values for association, *r* (*p*<sub>corr</sub>) correlation spearman's coefficient and *p* value of  
 342 correlation, *HPD* histopathological diagnosis, *T* tumor size, *LN* lymph node, *DFS* disease-free  
 343 survival, *OS* overall survival, *CTP* Child-Turcotte-Pugh classification for liver cell failure.  
 344 Spearman's rank, Mann-Whitney U and Kruskal-Wallis tests were used. Statistically significant  
 345 values (*p* < 0.05) are shown in bold.

346  
 347

348 **Role of GAS5 and miR-34a as markers of cancer prognosis**

349 ROC curves showed no prognostic value for GAS5 nor miR-34a to predict survival of cancer  
 350 patients in RCC and GB, or to predict CTP class for liver cell failure in HCC patients (*p* > 0.05)

351 **(Fig. 5).**



352

353 **Fig. 5 Receiver Operating Characteristics (ROC) analysis for the prognostic value of markers.**

354 *RCC* renal cell carcinoma, *GB* glioblastoma, *HCC* hepatocellular carcinoma, *AUC* area under  
355 curve, *CTP* Child-Turcotte-Pugh classification for liver cell failure

356

357 **Survival analysis in RCC and GB**

358 In RCC, multivariable analysis using logistic regression test (Enter method) showed age and  
359 pathological grade to be independent predictors for recurrence: (OR = 1.251, 95% CI = 1.075-  
360 1.455,  $p = 0.004$ ) for the age and (OR = 19.9, 95% CI = 1.034-383,  $p = 0.047$ ) for the grade.

361 Kaplan-Meier curve analysis and log-rank test revealed that RCC patients with female gender, post-  
362 nephrectomy recurrence, advanced pathological grade, and down-regulated miR-34a levels had  
363 significantly poor overall survival than their corresponding ( $p < 0.05$ ) (**Table 5**). In addition,  
364 multivariable analysis by Cox regression model demonstrated gender and recurrence to be  
365 independent predictors of overall survival (hazard ratio (HR)=2.49; 95 % confidence interval  
366 (95 % CI) 1.14–5.41,  $p = 0.021$ ) and (HR = 4.16; 95% CI of 1.88–9.16,  $p < 0.001$ ), respectively.

367 In GB, Kaplan-Meier curves showed a significant association of shorter survival times with male  
368 gender (Breslow test:  $p = 0.002$  and Tarane-Ware test:  $p = 0.030$ ). In addition, marginal  
369 significance was observed for poor overall survival in patients with frontal lesions (Log rank test:  $p$   
370 = 0.050) (**Table 6**). Multivariable analysis by Cox regression model illustrated tumor recurrence to  
371 be an independent predictor of low overall survival (HZ = 11.1; 95 % CI 2.88-42.5,  $p < 0.001$ ).

372

373

374

375

376

377

378  
379  
380

**Table 5. Multivariable analysis in renal cell carcinoma patients**

| Variables           | Survival time<br>OS (mo) | Overall comparisons |                  |                  | Cox regression          |                  |
|---------------------|--------------------------|---------------------|------------------|------------------|-------------------------|------------------|
|                     |                          | Log Rank            | Breslow          | Tarone-Ware      | HR (95% CI)             | <i>p</i>         |
| <b>Age</b>          |                          |                     |                  |                  |                         |                  |
| ≤55 years           | 13.1 ± 2.22              |                     |                  |                  |                         |                  |
| >55 years           | 16.1 ± 0.8               | 0.186               | 0.244            | 0.221            | 0.97 (0.92-1.01)        | 0.217            |
| <b>Gender</b>       |                          |                     |                  |                  |                         |                  |
| Female              | 13.9 ± 1.28              |                     |                  |                  |                         |                  |
| Male                | 16.7 ± 0.94              | <b>0.027</b>        | 0.077            | 0.095            | <b>2.49 (1.14-5.41)</b> | <b>0.021</b>     |
| <b>HPD</b>          |                          |                     |                  |                  |                         |                  |
| Type 1              | 16.1 ± 1.12              |                     |                  |                  |                         |                  |
| Type 2              | 17.5 ± 1.61              |                     |                  |                  | 0.70 (0.34-1.46)        | 0.351            |
| Type 3              | 13.3 ± 1.25              | 0.103               | 0.198            | 0.159            | 0.69 (0.30-1.60)        | 0.397            |
| <b>Location</b>     |                          |                     |                  |                  |                         |                  |
| Right side          | 16.3 ± 1.23              |                     |                  |                  |                         |                  |
| Left side           | 15.4 ± 1.00              | 0.703               | 0.489            | 0.539            | 1.08 (0.57-2.06)        | 0.807            |
| <b>Grade</b>        |                          |                     |                  |                  |                         |                  |
| Grade 1             | 16.3 ± 1.53              |                     |                  |                  |                         |                  |
| Grade 2             | 18.0 ± 1.17              |                     |                  |                  |                         |                  |
| Grade 3             | 12.8 ± 1.05              | <b>0.005</b>        | <b>0.003</b>     | <b>0.003</b>     | 1.60 (0.66-3.85)        | 0.293            |
| <b>Tumor size</b>   |                          |                     |                  |                  |                         |                  |
| T1                  | 16.4 ± 1.40              |                     |                  |                  |                         |                  |
| T2                  | 15.9 ± 1.13              |                     |                  |                  | 0.91 (0.30-2.75)        | 0.871            |
| T3                  | 14.5 ± 1.65              | 0.709               | 0.577            | 0.635            | 0.89 (0.34-2.29)        | 0.813            |
| <b>LN</b>           |                          |                     |                  |                  |                         |                  |
| Negative            | 16.4 ± 0.97              |                     |                  |                  |                         |                  |
| Positive            | 14.6 ± 1.27              | 0.306               | 0.235            | 0.255            | 1.05 (0.42-2.59)        | 0.911            |
| <b>Recurrence</b>   |                          |                     |                  |                  |                         |                  |
| Negative            | 17.5 ± 0.83              |                     |                  |                  |                         |                  |
| Positive            | 10.8 ± 1.07              | <b>&lt;0.001</b>    | <b>&lt;0.001</b> | <b>&lt;0.001</b> | <b>4.16 (1.88-9.16)</b> | <b>&lt;0.001</b> |
| <b>GAS5 fold</b>    |                          |                     |                  |                  |                         |                  |
| Under-expressed     | 15.7 ± 0.84              |                     |                  |                  |                         |                  |
| Over-expressed      | 16.2 ± 1.24              | 0.735               | 0.753            | 0.985            | 0.29 (1.04-0.96)        | 0.291            |
| <b>miR-34a fold</b> |                          |                     |                  |                  |                         |                  |
| Under-expressed     | 13.2 ± 0.99              |                     |                  |                  |                         |                  |
| Over-expressed      | 16.6 ± 0.95              | <b>0.010</b>        | <b>0.049</b>     | <b>0.024</b>     | 1.001 (0.98-1.01)       | 0.926            |

381 Survival times is shown as mean and standard error, *OS* overall survival, *HR (95% CI)* Hazard  
382 ratio (95% confidence interval), *HPD* histopathological diagnosis, *T* tumor size, *LN* lymph node,  
383 Statistically significant values ( $p < 0.05$ ) are shown in bold.

384  
385

386

387

388

389

390

391  
392

**Table 6. Multivariable analysis in glioblastoma patients**

| Variables             | Survival time | Overall comparisons |              |              | Cox regression          |                  |
|-----------------------|---------------|---------------------|--------------|--------------|-------------------------|------------------|
|                       | OS (mo)       | Log Rank            | Breslow      | Tarone-Ware  | HR (95% CI)             | <i>p</i>         |
| <b>Age</b>            |               |                     |              |              |                         |                  |
| ≤55 years             | 17.8 ± 1.4    | 0.742               | 0.683        | 0.595        | 1.03 (0.97-1.09)        | 0.298            |
| >55 years             | 17.0 ± 0.96   |                     |              |              |                         |                  |
| <b>Gender</b>         |               |                     |              |              |                         |                  |
| Female                | 20.5 ± 1.5    | 0.096               | <b>0.002</b> | <b>0.030</b> | 1.36 (0.45-4.11)        | 0.583            |
| Male                  | 16.2 ± 0.8    |                     |              |              |                         |                  |
| <b>Tumor location</b> |               |                     |              |              |                         |                  |
| Frontal               | 15.7 ± 1.01   | <b>0.050</b>        | 0.079        | 0.062        |                         | 0.749            |
| Temporo-paroetal      | 17.6 ± 1.3    |                     |              |              | 1.3 (0.53-3.39)         | 0.534            |
| Fronto-temporal       | 21.5 ± 2.1    |                     |              |              | 1.5 (0.44-5.75)         | 0.472            |
| <b>Recurrence</b>     |               |                     |              |              |                         |                  |
| Negative              | 17.6 ± 0.8    | 0.284               | 0.397        | 0.342        | <b>11.1 (2.88-42.5)</b> | <b>&lt;0.001</b> |
| Positive              | 15.3 ± 1.8    |                     |              |              |                         |                  |
| <b>GAS5 fold</b>      |               |                     |              |              |                         |                  |
| Under-expressed       | 17.5 ± 0.9    | 0.765               | 0.581        | 0.642        | 0.96 (0.49-1.85)        | 0.904            |
| Over-expressed        | 16.9 ± 1.6    |                     |              |              |                         |                  |
| <b>miR-34a fold</b>   |               |                     |              |              |                         |                  |
| Under-expressed       | 17.7 ± 0.9    | 0.460               | 0.453        | 0.415        | 1.14 (0.79-1.65)        | 0.471            |
| Over-expressed        | 16.1 ± 1.5    |                     |              |              |                         |                  |

393  
394  
395  
396

Survival time is shown as mean and standard error, *OS* overall survival, *HR (95% CI)* Hazard ratio (95% confidence interval). Statistically significant values ( $p < 0.05$ ) are shown in bold.

### 397 Hierarchical clustering analysis

398 Dendrograms for Two-way agglomerative hierarchical cluster analysis, were employed (**Fig. 6**).  
399 The following cluster setup parameters were adjusted: Distance method: Sorensen (Bray-Curtis),  
400 Group Linkage Method: Flexible Beta at 0.75, Clustering of factor relative by factor maximum. A  
401 distance matrix is shown. RCC plot analyzed 60 strands and 12 factors, GB plot analyzed 50 strands  
402 and 9 factors, whereas HCC dendrogram showed results of 30 strands and 11 factors. Clustering  
403 analysis revealed separation of RCC patients by GAS5 and miR-34a levels, GB patients by survival  
404 times, and HCC patients by their age.

405  
406  
407

408 **Fig. 6 Multivariate analysis of patients according to combined transcriptomic signature of**  
409 **genes and clinicopathological features. (A) RCC, (B) GB, (C) HCC.** RCC patients were divided  
410 based on GAS5 and miR-34a levels, GB patients were divided by survival times, and HCC patients  
411 by age

412

## 413 Discussion

414 In this study, we measured the expression of two ncRNAs; the lncRNA GAS5 and the miRNA  
415 miR-34a in three of the most prevalent and high-incidence tumors in Egypt; hepatic, renal and brain  
416 cancer. We chose more than one tumor type to assess if the same ncRNA could work differently  
417 according to the tissue type. We also investigated the possible association between GAS5 and miR-  
418 34a in mediating carcinogenesis after detecting an interaction between the two through our  
419 preliminary *in silico* analysis.

420 Our results show that *GAS5* was under-expressed in the three types of cancer; RCC, HCC and GB.  
421 On the other hand, levels of miR-34a greatly varied according to the tumor type. RCC patients had  
422 a lower *GAS5* level and a higher miR-34a level in tumor tissue compared to adjacent normal tissue.  
423 Moreover, *GAS5* levels were correlated with poor survival. In accordance, Qiao et al. reported a  
424 reduced *GAS5* level in RCC cell lines compared to normal cell lines. Furthermore, *in vitro* cloning  
425 and functional expression analysis revealed that *GAS5* overexpression caused cell cycle arrest,  
426 increased apoptosis, as well as inhibited tumor metastatic potential [24], which could explain the  
427 correlation between reduced patient survival and *GAS5* level in our study. As for miR-34a, several  
428 studies reported over-expression of this RNA in RCC patients [40, 41, 54-56]. Liu et al. predicted  
429 that its oncogenic function could be through targeting the two tumor suppressors secreted frizzled  
430 related protein 1 (SFRP1) and calmodulin binding transcription activator 1 (CAMTA1), and further  
431 validated the first target [40]. Another study noticed that miR-34a enhances cell survival, both in  
432 *in vitro* and *in vivo* during cisplatin nephrotoxicity through p53 [57]. Collectively, the previous studies  
433 suggest that miR-34a can act as an oncogene in renal tissue. On the contrary, Yadav et al. detected

434 a significant under-expression of miR-34a in both sera and renal tissues of RCC patients [58].  
435 Similar results were demonstrated by the studies of Zhang et al. and Weng et al. [59, 60], where the  
436 former study demonstrated that decreased expression of miR-34a in RCC patients inversely up-  
437 regulated the gene for the transcription factor YY1. The latter study suggested that under-  
438 expression of miR-34a in cancer tissues of RCC patients affected the regulation of the *NOTCH1*  
439 gene, as well as caused dysregulation of other multiple miR-34a targets in 786-O and Caki-1 RCC  
440 cell lines. Yu et al. found that miR-34a suppressed tumor growth and metastasis in *vivo* and in *vitro*  
441 through targeting CD44 [61]. Another study found that miR-34a inhibits cellular invasion in renal  
442 cancer cell lines A498 and 769P through targeting the 3' untranslated region (UTR) of the *c-myc*  
443 oncogene [62]. Also, the lncRNA NEAT1 (nuclear paraspeckle assembly transcript 1) was found to  
444 sponge miR-34a releasing its inhibition on the *c-met* oncogene, resulting in increased cellular  
445 proliferation and invasion in RCC cell lines 786-O and ACHN [63]. Furthermore, Bai et al. found  
446 that miR-34a causes senescence of rat renal cells through targeting two anti-oxidative mitochondrial  
447 genes [64]. Cellular senescence, which is an irreversible state of growth arrest, protects the cells  
448 from accumulating mutations that could lead to malignant transformation [65]. Further supporting  
449 the tumor suppressor potential of miR-34a, Zhou et al. provided evidence that miR-34a, secreted by  
450 fibroblasts, enhances apoptosis of renal tubular cells through regulating the anti-apoptotic gene  
451 *BCL-2* [66].

452 The inconsistent results between our study which shows up-regulation of *miR-34a* in RCC and  
453 other studies showing its under-regulation in the same type of cancer could have many possible  
454 explanations. First, we measured the expression of miR-34a in cancer tissues obtained directly from  
455 RCC patients as opposed to other studies conducted on cancer cell lines. While those cell lines are  
456 highly essential for functional molecular analysis, they may be different from primary tumors,  
457 possibly through building up new mutations in their attempt to adjust to their artificial environment  
458 [67, 68]. Such mutations may easily alter cellular responses and regulatory mechanisms, possibly  
459 affecting the expression of *miR-34a*. Second, miR-34a could be a non-specific molecule that can

460 both activate or inhibit tumorigenesis depending on the surrounding environment. These include  
461 internal stimuli (other regulatory molecules or polymorphisms, oxidative molecules, other  
462 associated disease states, tumor stage/grade or else) and external stimuli (cellular response to  
463 environmental exposures, including chemotherapy, other drugs, chemicals, foods, etc). Third, miR-  
464 34a has multiple targets (discussed in our previous work) [41], as well as being itself a target for  
465 many lncRNAs. Each study focuses on one or few targets, and infers a tumor suppressor or an  
466 oncogenic function based on its effect on the studied target/pathway. However, miR-34a is one  
467 small molecule in a larger network of molecules that either promotes or inhibits tumorigenesis  
468 based on the net result of *all* its regulated targets, which could easily differ according to countless  
469 variables. Given by the negative correlation of this microRNA with GAS5 in our RCC patients, as  
470 well as the predicted interaction between the two, we believe that a new pathway; the *GAS5*/miR-  
471 34a pathway might be involved in the previously indicated molecular network leading to RCC.

472 The interaction between lncRNAs and miRNAs can be multifaceted. Yoon et al. explained four  
473 mechanisms of interaction between the two types [69]. First, lncRNAs can act as miRNA sponges  
474 as previously mentioned with examples in the introduction. Second, the opposite can occur, where  
475 miRNAs can inhibit lncRNAs by binding to them and causing their degradation. This applies for  
476 miR145-5p, miR-181a-5p and miR-99b-3p which inhibit lncRNA ROR [70], and miR-9 which  
477 inhibits lncRNA MALAT1 [71]. Third, miRNAs and lncRNAs can both compete for the same  
478 binding site on mRNAs, an example of which is miR-485-5p and lncRNA BACE1AS competing  
479 for BACE1 mRNA [72]. Fourth and finally, another form of relationship exists between the two  
480 types; where the lncRNA (>200 nucleotide) is capable of generating smaller (<22 nucleotide)  
481 miRNAs such as the lncRNA H19 generating miR-675 [73]. GAS5 provides a perfect example for  
482 such interactions. For instance, GAS5 acts as a molecular sponge for many different microRNAs,  
483 including miR-21, miR-222, miR-196a, miR-205, miR-221 and miR-103. [16, 26, 74-77], all of  
484 which are related to cancer. Then again, both miR-21 and miR-222 can negatively regulate *GAS5*  
485 [27, 78]. Also, three of the snoRNAs produced by GAS5 (U44, U74 and U78) can give rise to

486 miRNAs [79], making GAS5 one of the lncRNAs generating miRNAs.

487 While functional validation has been yet required to prove the direct interaction between GAS5 and  
488 miR-34a, it is highly plausible. This is due to the already verified interaction between miR-34a and  
489 GAS1 (Growth arrest specific 1), another member of the *GAS* genes [42]. *GAS1* is a protein coding  
490 gene that, similar to *GAS5*, exerts its tumor suppressor actions through arresting the cell cycle and  
491 stimulating apoptosis [80]. Ma et al. measured the expression of miR-34a and the GAS1 protein in  
492 papillary thyroid carcinoma; GAS1 was under-expressed, while miR-34a was over-expressed.  
493 Further analysis revealed that miR-34a binds to the 3'UTR of GAS1 causing its silencing, which in  
494 turn activates the *RET* oncogene [42]. Through the BLAST tool, we detected sequence homology  
495 between the *GAS1* and the *GAS5* genes, further raising the possibility of interaction of miRNA-34a  
496 with GAS5. Given that *GAS5* is down-regulated and *miR-34a* is up-regulated in our study,  
497 tumorigenesis may be in such a case due to sponging of miR-34a by GAS5, where under-  
498 expression of *GAS5* in the rapidly dividing cancer cells causes release of the inhibition of miR-34a  
499 on its tumor suppressor targets, allowing for further tumor progression. Oppositely, the inverse  
500 correlation between the two could also suggest that miR-34a inhibits GAS5, making its under-  
501 expression a cause of cancer rather than a result, as in the case of the miR-34a -GAS1 interaction.

502 miR-34a expression levels in our study were not significant in the case of patients with HCC. *GAS5*  
503 levels, however, were under-expressed in HCC patients. In addition, lower GAS5 levels were  
504 associated with more numerous tumor foci. The same conclusions were reached by studies  
505 conducted by Tu et al., Chang et al. and Hu et al. who found that *GAS5* was under-expressed in  
506 HCC patients and predicted poor survival in those patients [15, 26, 81]. The latter study by Hu et al.  
507 found that under-expression of *GAS5* in HCC cell lines releases its sponging effect on oncomiR-21,  
508 which normally targets the two tumor suppressor genes *PDCD4* and *PTEN* [26]. On the contrary,  
509 according to Tao et al., *GAS5* was a proto-oncogene in HCC where they found an indel  
510 polymorphism in the promotor of *GAS5* that increased the risk of HCC in Chinese. In *vitro* analysis  
511 showed that the deletion allele of the polymorphism altered methylation of the *GAS5* promoter and

512 was associated with higher levels of GAS5 in HCC cell lines Sk-hep-1, Bel-7404 and Huh7.  
513 Further analysis provided evidence that the resulting over-expression of *GAS5* had an anti-apoptotic  
514 effect in those cell lines [82]. This divergence observed by Tao et al. could be due to racial  
515 differences. In other words, the allele causing *GAS5* over-expression might be more common in  
516 their studied population. To further confirm this probability, we searched the 1000 genome project  
517 phase 3 databases [83] for this indel polymorphism (positon 1:173868254-173868258 (AGGCA/-)).  
518 We found that the frequency of the deletion allele was very high in Asians and Chinese in particular  
519 (28-40%) as compared to other races (3-12%), showing that in other populations the effect of the  
520 polymorphism on HCC and *GAS5* expression could be negligible.

521 In patients with GB, both GAS5 and miR-34a levels were significantly down-regulated. Zhang et  
522 al. correlated the expression of five lncRNAs including GAS5 with GB, and found that higher  
523 levels of GAS5 were associated with prolonged survival [84]. Zhao et al. found that *GAS5* was  
524 under-expressed in glioma cell lines U87 and U251 and that its tumor suppressor role was through  
525 targeting miR-222 [16]. The same author, in a more recent study, added another miRNA to the  
526 targets of GAS5; miR-196a-5p, where *GAS5* under-expression in human glioma stem cells  
527 enhanced tumor progression through inhibiting this miRNA [85]. Regarding the more controversial  
528 *miR-34a*, studies on brain cancer, including GB and glioma agree on its role as a tumor suppressor  
529 in this particular tissue; reviewed in [86], which fits in with its expression status in the present  
530 study.

## 531 **Conclusions**

532 In this study, we show that *GAS5* is under-expressed in three types of tumors, in addition to being  
533 associated with tumor prognosis in some types. Consequently, we believe that GAS5 could  
534 potentially be used as a prognostic marker for cancer. Furthermore, in favor of this notion is the  
535 predicted subcellular localization of GAS5 provided by our in *silico* analysis, which shows that  
536 GAS5 is most significantly localized in the extracellular exosomes, supporting its existence in the  
537 circulation and highlighting its putative role as a non-invasive biomarker which mirrors tissue



538 pathology. Furthermore, we suppose that miR-34a might be a potential target of GAS5, or *vice*  
539 *versa*. However, we confirm that further studies are required to validate this interaction.

#### 540 **Acknowledgements**

541 The authors thank the Center of Excellence in Molecular and Cellular Medicine and the Oncology  
542 Diagnostic Unit, Suez Canal University, Ismailia, Egypt for providing the facilities for performing  
543 the research work.

#### 544 **Compliance with ethical standards**

#### 545 **Conflicts of interest**

546 The authors declare that they have no competing interests.

#### 547 **Funding**

548 None.

#### 549 **References**

- 550 [1] WHO | Cancer [WWW Document], World Health Organization. Available from URL  
551 <http://www.who.int/mediacentre/factsheets/fs297/en/> (accessed 9.2.18).
- 552 [2] Grandér D. How do mutated oncogenes and tumor suppressor genes cause cancer? *Med*  
553 *Oncol.* 1998; 15:20–6. <https://doi.org/10.1007/BF02787340>
- 554 [3] ENCODE Project Consortium. An integrated encyclopedia of DNA elements in the human  
555 genome. *Nature.* 2012;489:57–74. <https://doi.org/10.1038/nature11247>
- 556 [4] Paraskevopoulou MD, Hatzigeorgiou AG. Analyzing MiRNA–LncRNA Interactions, in:  
557 Long Non-Coding RNAs, *Methods in Molecular Biology*. Humana Press, New York, NY,  
558 2016; pp. 271–286. [https://doi.org/10.1007/978-1-4939-3378-5\\_21](https://doi.org/10.1007/978-1-4939-3378-5_21)
- 559 [5] Bartonicek N, Maag JLV, Dinger ME. Long noncoding RNAs in cancer: mechanisms of  
560 action and technological advancements. *Mol Cancer.* 2016; 15:43.  
561 <https://doi.org/10.1186/s12943-016-0530-6>
- 562 [6] Leva GD, Garofalo M, Croce CM. MicroRNAs in Cancer. *Annu Rev Pathol Mech Dis.*  
563 2014; 9:287–314. <https://doi.org/10.1146/annurev-pathol-012513-104715>

- 564 [7] Mannoor K, Liao J, Jiang F. Small nucleolar RNAs in cancer. *Biochim Biophys Acta*. 2012;  
565 1826. <https://doi.org/10.1016/j.bbcan.2012.03.005>
- 566 [8] Ng KW, Anderson C, Marshall EA, Minatel BC, Enfield KSS, Saprunoff HL, et al. Piwi-  
567 interacting RNAs in cancer: emerging functions and clinical utility. *Mol Cancer*. 2016; 15:5.  
568 <https://doi.org/10.1186/s12943-016-0491-9>
- 569 [9] Lo P-K, Wolfson B, Zhou X, Duru N, Gernapudi R, Zhou Q. Noncoding RNAs in breast  
570 cancer. *Brief Funct Genomics*. 2016; 15: 200–21. <https://doi.org/10.1093/bfpg/elv055>
- 571 [10] Raho G, Barone V, Rossi D, Philipson L, Sorrentino V. The gas 5 gene shows four  
572 alternative splicing patterns without coding for a protein. *Gene*. 2000; 256:13–7.  
573 [https://doi.org/10.1016/S0378-1119\(00\)00363-2](https://doi.org/10.1016/S0378-1119(00)00363-2)
- 574 [11] Smith CM, Steitz JA. Classification of gas5 as a Multi-Small-Nucleolar-RNA (snoRNA)  
575 Host Gene and a Member of the 5'-Terminal Oligopyrimidine Gene Family Reveals  
576 Common Features of snoRNA Host Genes. *Mol Cell Biol*. 1998;18:6897-909.
- 577 [12] Maden BE, Hughes JM. Eukaryotic ribosomal RNA: the recent excitement in the  
578 nucleotide modification problem. *Chromosoma*. 1997; 105:391–400.
- 579 [13] Schneider C, King RM, Philipson L. Genes specifically expressed at growth arrest of  
580 mammalian cells. *Cell*. 1988; 54:787–93.
- 581 [14] Coccia EM, Cicala C, Charlesworth A, Ciccarelli C, Rossi G B, Philipson L, et al.  
582 Regulation and expression of a growth arrest-specific gene (gas5) during growth,  
583 differentiation, and development. *Molecular and Cellular Biology*. 1992; 12:3514-21.
- 584 [15] Chang L, Li C, Lan T, Long Wu, Yufeng Yuan, Quanyan Liuet, al. Decreased expression  
585 of long non-coding RNA GAS5 indicates a poor prognosis and promotes cell proliferation  
586 and invasion in hepatocellular carcinoma by regulating vimentin. *Mol Med Rep*. 2016;  
587 13:1541-50. <https://doi.org/10.3892/mmr.2015.4716>
- 588 [16] Xihe Zhao, Ping Wang, Jing Liu, Jian Zheng, Yunhui Liu, Jiajia Chen et al. Gas5 Exerts  
589 Tumor-suppressive Functions in Human Glioma Cells by Targeting miR-222. *Mol Ther*.

- 590 23:1899–911. <https://doi.org/10.1038/mt.2015.170>
- 591 [17] Wenjun Liang, Tangfeng Lv, Xuefei Shi, Hongbing Liu, Qingqing Zhu, Junli Zeng, et al.  
592 Circulating long noncoding RNA GAS5 is a novel biomarker for the diagnosis of nonsmall  
593 cell lung cancer. *Medicine (Baltimore)*. 2016; 95:e4608.  
594 <https://doi.org/10.1097/MD.0000000000004608>
- 595 [18] Cao Q, Wang N, Qi J, Gu Z, Shen H. Long non-coding RNA-GAS5 acts as a tumor  
596 suppressor in bladder transitional cell carcinoma via regulation of chemokine (C-C motif)  
597 ligand 1 expression. *Mol Med Rep*. 2016; 13:27–34. <https://doi.org/10.3892/mmr.2015.4503>
- 598 [19] Yacqub-Usman K, Pickard MR, Williams GT. Reciprocal regulation of GAS5 lncRNA  
599 levels and mTOR inhibitor action in prostate cancer cells. *The Prostate* 2015; 75:693–705.  
600 <https://doi.org/10.1002/pros.22952>
- 601 [20] Pickard MR, Williams GT 2014. Regulation of apoptosis by long non-coding RNA GAS5  
602 in breast cancer cells: implications for chemotherapy. *Breast Cancer Res Treat*. 2014;  
603 145:359–70. <https://doi.org/10.1007/s10549-014-2974-y>
- 604 [21] Guo C, Song W-Q, Sun P, Jin L, Dai H-Y. LncRNA-GAS5 induces PTEN expression  
605 through inhibiting miR-103 in endometrial cancer cells. *J. Biomed. Sci*. 2015; 22:100.  
606 <https://doi.org/10.1186/s12929-015-0213-4>
- 607 [22] Lu X, Fang Y, Wang Z, Xie J, Zhan Q, Deng X, et al. Downregulation of gas5 increases  
608 pancreatic cancer cell proliferation by regulating CDK6. *Cell Tissue Res*. 2013; 354:891–6.  
609 <https://doi.org/10.1007/s00441-013-1711-x>
- 610 [23] Yin D, He X, Zhang E, Kong R, De W, Zhang Z. Long noncoding RNA GAS5 affects cell  
611 proliferation and predicts a poor prognosis in patients with colorectal cancer. *Med Oncol*  
612 Northwood Lond Engl. 2014; 31:253. <https://doi.org/10.1007/s12032-014-0253-8>
- 613 [24] Qiao H-P, Gao W-S, Huo J-X, Yang Z-S. Long Non-coding RNA GAS5 Functions as a  
614 Tumor Suppressor in Renal Cell Carcinoma. *Asian Pac J Cancer Prev*. 2013; 14: 1077–82.  
615 <https://doi.org/10.7314/APJCP.2013.14.2.1077>

- 616 [25] Nakamura Y, Takahashi N, Kakegawa E, Yoshida K, Ito Y, Kayano H, et al. The GAS5  
617 (growth arrest-specific transcript 5) gene fuses to BCL6 as a result of t(1;3) (q25;q27) in a  
618 patient with B-cell lymphoma. *Cancer Genet. Cytogenet.* 2008; 182:144–9.  
619 <https://doi.org/10.1016/j.cancergencyto.2008.01.013>
- 620 [26] Hu L, Ye H, Huang G, Luo F, Liu Y, Liu Y, et al. Long noncoding RNA GAS5  
621 suppresses the migration and invasion of hepatocellular carcinoma cells via miR-21.  
622 *Tumour Biol.* 2016; 37:2691–702. <https://doi.org/10.1007/s13277-015-4111-x>
- 623 [27] Zhang Z, Zhu Z, Watabe K, Zhang X, Bai C, Xu M, et al. Negative regulation of lncRNA  
624 GAS5 by miR-21. *Cell Death Differ.* 2013; 20:1558–68.  
625 <https://doi.org/10.1038/cdd.2013.110>
- 626 [28] He L, He X, Lim LP, de Stanchina E, Xuan Z, Liang Y, et al. A microRNA component of  
627 the p53 tumour suppressor network. *Nature.* 2007; 447:1130–4.  
628 <https://doi.org/10.1038/nature05939>
- 629 [29] Lodygin D, Tarasov V, Epanchintsev A, Berking C, Knyazeva T, Körner H, et al.  
630 Inactivation of miR-34a by aberrant CpG methylation in multiple types of cancer. *Cell*  
631 *Cycle.* 2008; 7:2591–600. <https://doi.org/10.4161/cc.7.16.6533>
- 632 [30] Welch C, Chen Y, Stallings RL. MicroRNA-34a functions as a potential tumor suppressor  
633 by inducing apoptosis in neuroblastoma cells. *Oncogene.* 2007; 26:5017–22.  
634 <https://doi.org/10.1038/sj.onc.1210293>
- 635 [31] Chim CS, Wong KY, Qi Y, Loong F, Lam WL, Wong LG, et al. Epigenetic inactivation  
636 of the miR-34a in hematological malignancies. *Carcinogenesis.* 2010; 31: 745–50.  
637 <https://doi.org/10.1093/carcin/bgq033>
- 638 [32] Ji Q, Hao X, Zhang M, Tang W, Yang M, Li L, et al. MicroRNA miR-34 inhibits human  
639 pancreatic cancer tumor-initiating cells. *PloS One.* 2009; 4:e6816.  
640 <https://doi.org/10.1371/journal.pone.0006816>
- 641 [33] Li N, Fu H, Tie Y, Hu Z, Kong W, Wu Y, et al. miR-34a inhibits migration and invasion

- 642 by down-regulation of c-Met expression in human hepatocellular carcinoma cells. *Cancer*  
643 *Lett.* 2009; 275:44–53. <https://doi.org/10.1016/j.canlet.2008.09.035>
- 644 [34] Shehata RH, Abdelmoneim SS, Osman OA, Hasanain AF, Osama A, Abdelmoneim SS, et  
645 al. Deregulation of miR-34a and Its Chaperon Hsp70 in Hepatitis C virus-Induced Liver  
646 Cirrhosis and Hepatocellular Carcinoma Patients. *Asian Pacific Journal of Cancer*  
647 *Prevention. APJCP.* 2017;18(9):2395-2401. doi:10.22034/APJCP.2017.18.9.2395
- 648 [35] Li Y, Guessous F, Zhang Y, Dipierro C, Kefas B, Johnson E, et al. MicroRNA-34a  
649 inhibits glioblastoma growth by targeting multiple oncogenes. *Cancer Res.* 2009; 69: 7569–  
650 76. <https://doi.org/10.1158/0008-5472.CAN-09-0529>
- 651 [36] Toraih EA, Aly NM, Abdallah HY, Al-Qahtani SA, Shaalan AA, Hussein MH, et al.  
652 MicroRNA-target cross-talks: Key players in glioblastoma multiforme. *Tumour Biol.*  
653 2017;39(11):1010428317726842. <https://doi.org/10.1177/1010428317726842>
- 654 [37] Kato M1, Paranjape T, Müller RU, Nallur S, Gillespie E, Keane K, et al. The mir-34  
655 microRNA is required for the DNA damage response in vivo in *C. elegans* and in vitro in  
656 human breast cancer cells. *Oncogene.* 2009; 28:2419–24.  
657 <https://doi.org/10.1038/onc.2009.106>
- 658 [38] Wiggins JF, Ruffino L, Kelnar K, Omotola M, Patrawala L, Brown D, et al. Development  
659 of a lung cancer therapeutic based on the tumor suppressor microRNA-34. *Cancer Res.*  
660 2010; 70:5923–30. <https://doi.org/10.1158/0008-5472.CAN-10-0655>
- 661 [39] Tazawa H, Tsuchiya N, Izumiya M, Nakagama H. Tumor-suppressive miR-34a induces  
662 senescence-like growth arrest through modulation of the E2F pathway in human colon  
663 cancer cells. *Proc Natl Acad Sci USA.* 2007; 104:15472–7.  
664 <https://doi.org/10.1073/pnas.0707351104>
- 665 [40] Liu H, Brannon AR, Reddy AR, Alexe G, Seiler MW, Arreola A, et al. Identifying mRNA  
666 targets of microRNA dysregulated in cancer: with application to clear cell Renal Cell  
667 Carcinoma. *BMC Syst Biol.* 2010; 4:51. <https://doi.org/10.1186/1752-0509-4-51>

- 668 [41] Toraih EA, Ibrahiem AT, Fawzy MS, Hussein MH, Al-Qahtani SAM, Shaalan AAM.  
669 MicroRNA-34a: A Key Regulator in the Hallmarks of Renal Cell Carcinoma. *Oxid Med*  
670 *Cell Longev.* 2017; 2017:3269379. <https://doi.org/10.1155/2017/3269379>
- 671 [42] Ma Y, Qin H, Cui Y. MiR-34a targets GAS1 to promote cell proliferation and inhibit  
672 apoptosis in papillary thyroid carcinoma via PI3K/Akt/Bad pathway. *Biochem Biophys Res*  
673 *Commun.* 2013; 441:958–63. <https://doi.org/10.1016/j.bbrc.2013.11.01043>. Tazawa et al.,  
674 2007
- 675 [43] Marsh EE1, Lin Z, Yin P, Milad M, Chakravarti D, Bulun SE. Differential expression of  
676 microRNA species in human uterine leiomyoma versus normal myometrium. *Fertil Steril.*  
677 2008; 89:1771–6. <https://doi.org/10.1016/j.fertnstert.2007.05.074>
- 678 [44] Llovet JM, Fuster J, Bruix J. Barcelona-Clinic Liver Cancer Group. The Barcelona  
679 approach: diagnosis, staging, and treatment of hepatocellular carcinoma. *Liver Transpl.*  
680 2004; 10:S115-20. doi: 10.1002/lt.20034
- 681 [45] Toraih EA, Fawzy MS, El-Falouji AI, Elham O Hamed, Nader A Nemr, Mohammad H  
682 Hussein, et al. Stemness-Related Transcriptional Factors and Homing Gene Expression  
683 Profiles in Hepatic Differentiation and Cancer. *Mol Med.* 2016; 22:653-63.  
684 <https://doi.org/10.2119/molmed.2016.00096>
- 685 [46] Toraih EA, Fawzy MS, Mohammed EA, Hussein MH, El-Labban MM. MicroRNA-196a2  
686 Biomarker and Targetome Network Analysis in Solid Tumors. *Mol Diagn Ther.* 2016;  
687 20:559-77. <https://doi.org/10.1007/s40291-016-0223-2>
- 688 [47] Bustin SA, Benes V, Garson JA, Hellemans J, Huggett J, Kubista M, et al. The MIQE  
689 guidelines: minimum information for publication of quantitative real-time PCR experiments.  
690 *Clin Chem.* 2009; 55:611–22. <https://doi.org/10.1373/clinchem.2008.112797>
- 691 [48] Toraih EA, Mohammed EA, Farrag S, Ramsis N, Hosny S. Pilot Study of Serum  
692 MicroRNA-21 as a Diagnostic and Prognostic Biomarker in Egyptian Breast Cancer  
693 Patients. *Mol Diagn Ther.* 2015; 19:179-90. <https://doi.org/10.1007/s40291-015-0143-6>.

- 694 [49] Valente V, Teixeira SA, Neder L, Okamoto OK, Oba-Shinjo SM, Marie SK, et al.  
695 Selection of suitable housekeeping genes for expression analysis in glioblastoma using  
696 quantitative RT-PCR. *Ann Neurosci*. 2014; 21(2):62-3.  
697 <https://doi.org/10.5214/ans.0972.7531.210207>
- 698 [50] Aithal MGS, Rajeswari N. Validation of Housekeeping Genes for Gene Expression  
699 Analysis in Glioblastoma Using Quantitative Real-Time Polymerase Chain Reaction. *Brain*  
700 *Tumor Res Treat*. 2015; 3:24-29. <https://doi.org/10.14791/btrt.2015.3.1.24>.
- 701 [51] Livak KJ, Schmittgen TD. Analysis of relative gene expression data using real-time  
702 quantitative PCR and the 2<sup>-</sup>(-Delta Delta C (T)) Method. *Methods*. 2001, 25:402–8.  
703 <https://doi.org/10.1006/meth.2001.1262>
- 704 [52] McCune B, Mefford MJ. PC-ORD. Multivariate Analysis of Ecological Data. Version 6.  
705 MjM Software, Gleneden Beach, Oregon, USA, 2011.
- 706 [53] Yamashita R, Suzuki Y, Takeuchi N, Wakaguri H, Ueda T, Sugano S, et al.  
707 Comprehensive detection of human terminal oligo-pyrimidine (TOP) genes and analysis of  
708 their characteristics. *Nucleic Acids Res*. 2008; 36:3707-15.  
709 <https://doi.org/10.1093/nar/gkn248>
- 710 [54] Cheng T, Wang L, Li Y, Huang C, Zeng L, Yang J. Differential microRNA expression in  
711 renal cell carcinoma. *Oncol Lett*. 2013; 6:769–76. <https://doi.org/10.3892/ol.2013.1460>
- 712 [55] Munari E, Marchionni L, Chitre A, Hayashi M, Martignoni G, Brunelli M, et al. Clear cell  
713 papillary renal cell carcinoma: micro-RNA expression profiling and comparison with clear  
714 cell renal cell carcinoma and papillary renal cell carcinoma. *Hum Pathol*. 2014; 45:1130–8.  
715 <https://doi.org/10.1016/j.humpath.2014.01.013>
- 716 [56] Fritz HK, Gustafsson A, Ljungberg B, Ceder Y, Axelson H, Dahlbäck B. The Axl-  
717 Regulating Tumor Suppressor miR-34a Is Increased in ccRCC but Does Not Correlate with  
718 Axl mRNA or Axl Protein Levels. *PloS One*. 2015; 10:e0135991.  
719 <https://doi.org/10.1371/journal.pone.0135991>

- 720 [57] Bhatt K, Zhou L, Mi QS, Huang S, She JX, Dong Z. MicroRNA-34a is induced via p53  
721 during cisplatin nephrotoxicity and contributes to cell survival. *Mol Med.* 2010; 16:409–16.  
722 <https://doi.org/10.2119/molmed.2010.00002>
- 723 [58] Yadav S, Khandelwal M, Seth A, Saini AK, Dogra PN, Sharma A. Serum microRNA  
724 Expression Profiling: Potential Diagnostic Implications of a Panel of Serum microRNAs for  
725 Clear Cell Renal Cell Cancer. *Urology.* 2017; 104:64–9.  
726 <https://doi.org/10.1016/j.urology.2017.03.013>
- 727 [59] Zhang EB, Kong R, Yin DD, You LH, Sun M, Han L, et al. Long noncoding RNA  
728 ANRIL indicates a poor prognosis of gastric cancer and promotes tumor growth by  
729 epigenetically silencing of miR-99a/miR-449a. *Oncotarget.* 5:2276–92.  
730 <https://doi.org/10.18632/oncotarget.1902>
- 731 [60] Weng W, Wang M, Xie S, Long Y, Li F, Sun F, et al. YY1-C/EBP $\alpha$ -miR34a regulatory  
732 circuitry is involved in renal cell carcinoma progression. *Oncol Rep.* 2014; 31:1921–7.  
733 <https://doi.org/10.3892/or.2014.3005>
- 734 [61] Yu G, Li H, Wang J, Gumireddy K, Li A, Yao W, et al. miRNA-34a Suppresses Cell  
735 Proliferation and Metastasis by Targeting CD44 in Human Renal Carcinoma Cells. *J Urol.*  
736 2014; 192:1229–37. <https://doi.org/10.1016/j.juro.2014.05.094>
- 737 [62] Yamamura S, Saini S, Majid S, Hirata H, Ueno K, Chang I, et al. MicroRNA-34a  
738 suppresses malignant transformation by targeting c-Myc transcriptional complexes in  
739 human renal cell carcinoma. *Carcinogenesis.* 2012; 33:294–300.  
740 <https://doi.org/10.1093/carcin/bgr286>
- 741 [63] Liu F, Chen N, Gong Y, Xiao R, Wang W, Pan Z. The long non-coding RNA NEAT1  
742 enhances epithelial-to-mesenchymal transition and chemoresistance via the miR-34a/c-Met  
743 axis in renal cell carcinoma. *Oncotarget.* 2017; 8:62927–38.  
744 <https://doi.org/10.18632/oncotarget.17757>
- 745 [64] Bai XY, Ma Y, Ding R, Fu B, Shi S, Chen XM. miR-335 and miR-34a Promote Renal



- 746 Senescence by Suppressing Mitochondrial Antioxidative Enzymes. *J Am Soc Nephrol.*  
747 2011; 22:1252–61. <https://doi.org/10.1681/ASN.2010040367>
- 748 [65] Collado M, Blasco MA, Serrano M. Cellular Senescence in Cancer and Aging. *Cell.* 2007;  
749 130:223–33. <https://doi.org/10.1016/j.cell.2007.07.003>
- 750 [66] Zhou Y, Xiong M, Niu J, Sun Q, Su W, Zen K, et al. Secreted fibroblast-derived miR-34a  
751 induces tubular cell apoptosis in fibrotic kidney. *J Cell Sci.* 2014; 127:4494–506.  
752 <https://doi.org/10.1242/jcs.155523>
- 753 [67] Borrell B. How accurate are cancer cell lines? *Nature.* 2010; 463:858.  
754 <https://doi.org/10.1038/463858a>
- 755 [68] Clark MJ, Homer N, O'Connor BD, Chen Z, Eskin A, Lee H, et al. U87MG Decoded: The  
756 Genomic Sequence of a Cytogenetically Aberrant Human Cancer Cell Line. *PLoS Genet.*  
757 2010; 6:e1000832. <https://doi.org/10.1371/journal.pgen.1000832>
- 758 [69] Yoon JH, Abdelmohsen K, Srikantan S, Yang X, Martindale JL, De S, et al. LincRNA-  
759 p21 suppresses target mRNA translation. *Mol Cell.* 2012; 47:648–55.  
760 <https://doi.org/10.1016/j.molcel.2012.06.027>
- 761 [70] Wang Y, Xu Z, Jiang J, Xu C, Kang J, Xiao L, et al. Endogenous miRNA Sponge  
762 lincRNA-RoR Regulates Oct4, Nanog, and Sox2 in Human Embryonic Stem Cell Self-  
763 Renewal. *Dev Cell.* 2013; 25:69–80. <https://doi.org/10.1016/j.devcel.2013.03.002>
- 764 [71] Leucci E, Patella F, Waage J, Holmstrøm K, Lindow M, Porse B, et al. microRNA-9  
765 targets the long non-coding RNA MALAT1 for degradation in the nucleus. *Sci Rep.* 2013;  
766 3:2535. <https://doi.org/10.1038/srep02535>
- 767 [72] Faghihi MA, Zhang M, Huang J, Modarresi F, Van der Brug MP, Nalls MA, et al.  
768 Evidence for natural antisense transcript-mediated inhibition of microRNA function.  
769 *Genome Biol.* 2010; 11: R56. <https://doi.org/10.1186/gb-2010-11-5-r56>
- 770 [73] Keniry A1, Oxley D, Monnier P, Kyba M, Dandolo L, Smits G, et al. The H19 lincRNA is  
771 a developmental reservoir of miR-675 that suppresses growth and Igf1r. *Nat Cell Biol.*

- 772 2012; 14:659–65. <https://doi.org/10.1038/ncb2521>
- 773 [74] Guo C, Song WQ, Sun P, Jin L, Dai HY. LncRNA-GAS5 induces PTEN expression  
774 through inhibiting miR-103 in endometrial cancer cells. *J Biomed Sci.* 2015; 22:100.  
775 <https://doi.org/10.1186/s12929-015-0213-4>
- 776 [75] Xue D, Zhou C, Lu H, Xu R, Xu X, He X. LncRNA GAS5 inhibits proliferation and  
777 progression of prostate cancer by targeting miR-103 through AKT/mTOR signaling  
778 pathway. *Tumor Biol.* 2016; 37:16187–97. <https://doi.org/10.1007/s13277-016-5429-8>
- 779 [76] Yang W, Hong L, Xu X, Wang Q, Huang J, Jiang L. LncRNA GAS5 suppresses the  
780 tumorigenesis of cervical cancer by downregulating miR-196a and miR-205. *Tumour Biol.*  
781 2017; 39:1010428317711315. <https://doi.org/10.1177/1010428317711315>
- 782 [77] Ye K, Wang S, Zhang H, Han H, Ma B, Nan W. Long Noncoding RNA GAS5 Suppresses  
783 Cell Growth and Epithelial-Mesenchymal Transition in Osteosarcoma by Regulating the  
784 miR-221/ARHI Pathway. *J Cell Biochem.* 2017; 118:4772-81.  
785 <https://doi.org/10.1002/jcb.26145>
- 786 [78] Yu F, Zheng J, Mao Y, Dong P, Lu Z, Li G, et al. Long Non-coding RNA Growth Arrest-  
787 specific Transcript 5 (GAS5) Inhibits Liver Fibrogenesis through a Mechanism of  
788 Competing Endogenous RNA. *J Biol Chem.* 2015; 290:28286–98.  
789 <https://doi.org/10.1074/jbc.M115.683813>
- 790 [79] Brameier M, Herwig A, Reinhardt R, Walter L, Gruber J. Human box C/D snoRNAs with  
791 miRNA like functions: expanding the range of regulatory RNAs. *Nucleic Acids Res.* 2011;  
792 39:675–86. <https://doi.org/10.1093/nar/gkq776>
- 793 [80] Domínguez-Monzón G, Benítez JA, Vergara P, Lorenzana R, Segovia J. Gas1 inhibits cell  
794 proliferation and induces apoptosis of human primary gliomas in the absence of Shh. *Int J*  
795 *Dev Neurosci.* 2009; 27:305–13. <https://doi.org/10.1016/j.ijdevneu.2009.03.009>
- 796 [81] Tu ZQ, Li RJ, Mei JZ, Li XH. Down-regulation of long non-coding RNA GAS5 is  
797 associated with the prognosis of hepatocellular carcinoma. *Int. J Clin Exp Pathol.* 2014;

- 798 7:4303–9.
- 799 [82] Tao R, Hu S, Wang S, Zhou X, Zhang Q, Wang C, et al. Association between indel  
800 polymorphism in the promoter region of lncRNA GAS5 and the risk of hepatocellular  
801 carcinoma. *Carcinogenesis*. 2015; 36:1136–43. <https://doi.org/10.1093/carcin/bgv099>
- 802 [83] The 1000 Genomes Project Consortium. A global reference for human genetic variation.  
803 *Nature*. 2015; 526:68–74. <https://doi.org/10.1038/nature15393>
- 804 [84] Zhang XQ, Sun S, Lam KF, Kiang KM, Pu JK, Ho AS, et al. A long non-coding RNA  
805 signature in glioblastoma multiforme predicts survival. *Neurobiol Dis*. 2013; 58:123–31.  
806 <https://doi.org/10.1016/j.nbd.2013.05.011>
- 807 [85] Zhao X, Liu Y, Zheng J, Liu X, Chen J, Liu L, et al. GAS5 suppresses malignancy of  
808 human glioma stem cells via a miR-196a-5p/FOXO1 feedback loop. *Biochim Biophys Acta*.  
809 2017; 1864:1605–17. <https://doi.org/10.1016/j.bbamcr.2017.06.020>
- 810 [86] Møller HG, Rasmussen AP, Andersen HH, Johnsen KB, Henriksen M, Duroux M. A  
811 Systematic Review of MicroRNA in Glioblastoma Multiforme: Micro-modulators in the  
812 Mesenchymal Mode of Migration and Invasion. *Mol Neurobiol*. 2013; 47:131–44.  
813 <https://doi.org/10.1007/s12035-012-8349-7>

814

## 815 **Supporting Information**

816 **S1 Table: GAS5 alternative splicing transcripts.**

817 **S2 Table: GAS5 common variants.**

818 **S3 Table: LncRNA GAS5-microRNA interaction.**

819 **S4 Table: Complementarity between GAS5 transcripts and miR-34a-5p.**

820 **S5 Table: hsa-miR-34a pathways.**

(A)

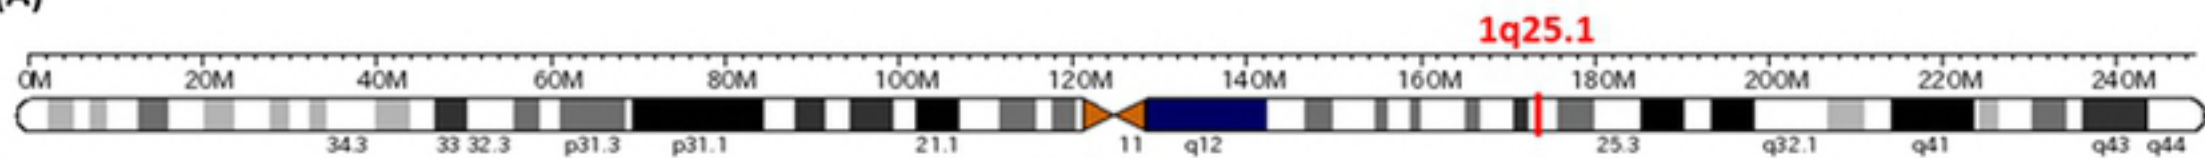

(B)

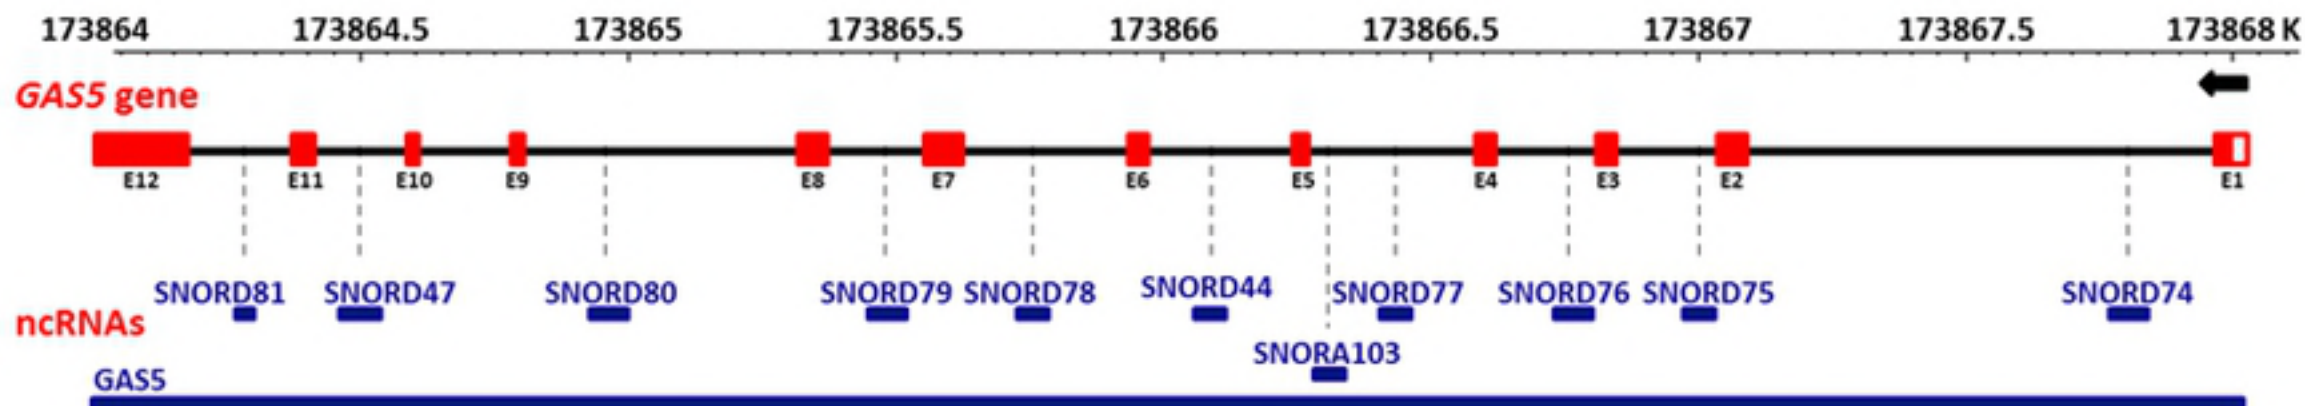

(C)

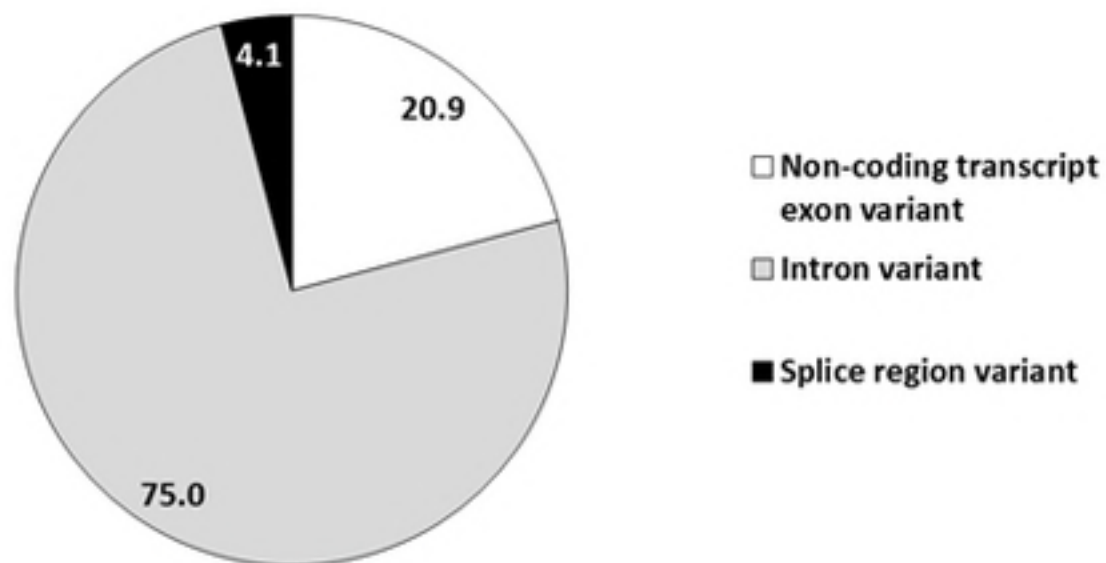

(D)

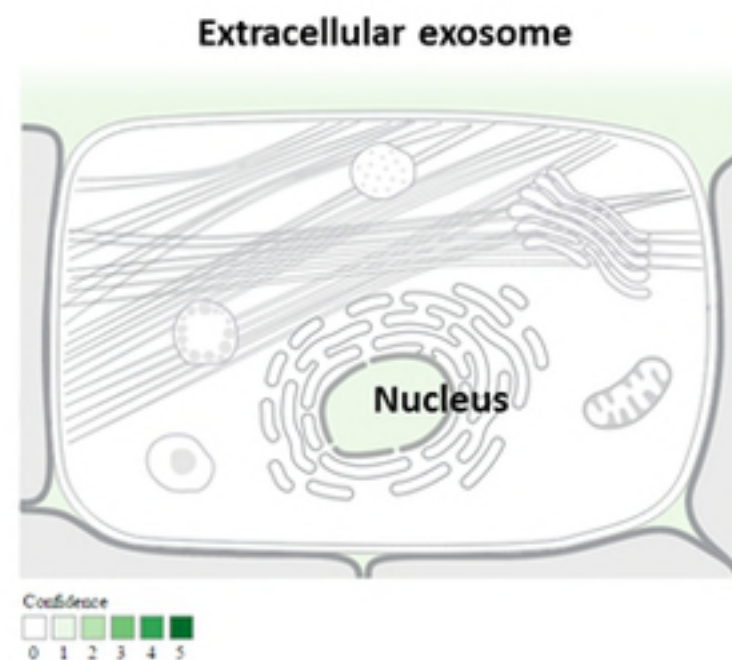

(E)

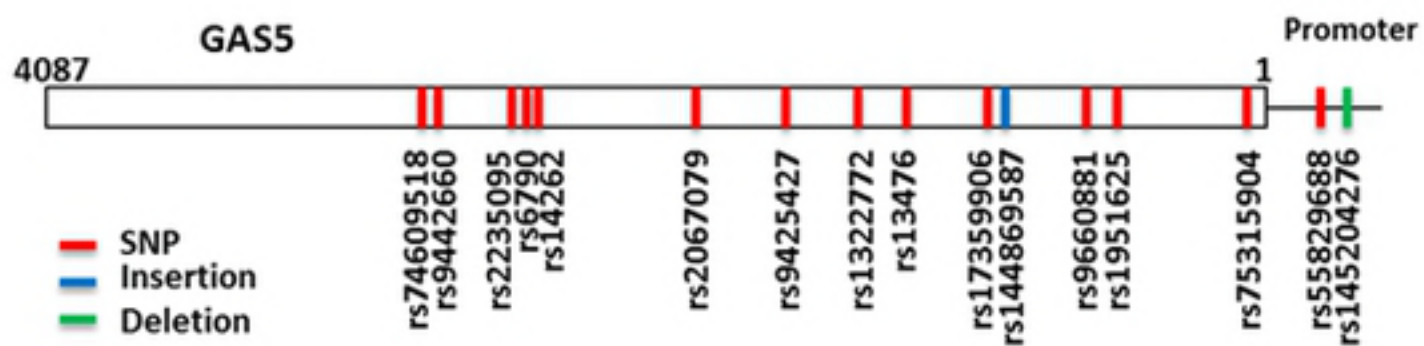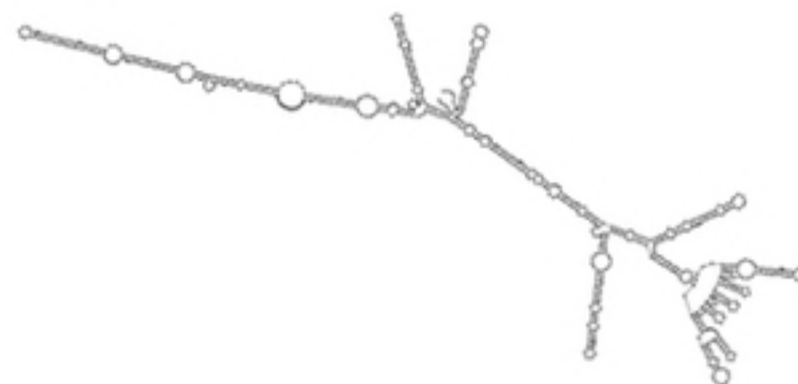

(A)

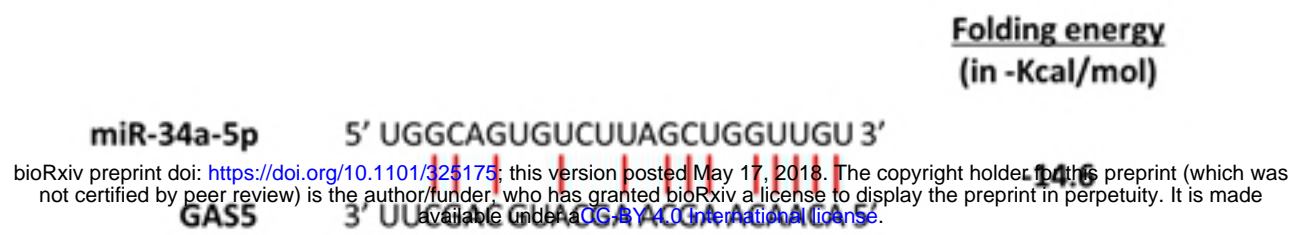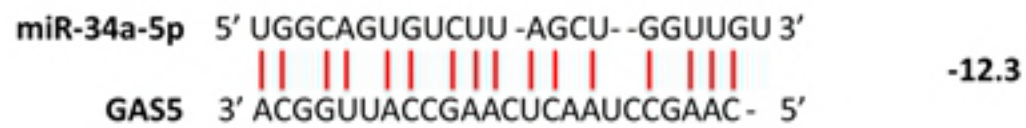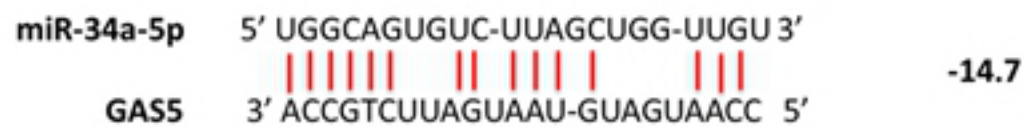

(B)

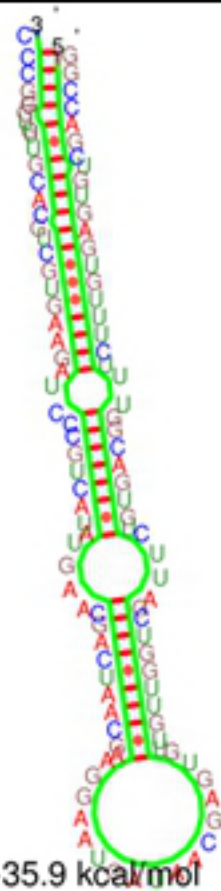

(C)

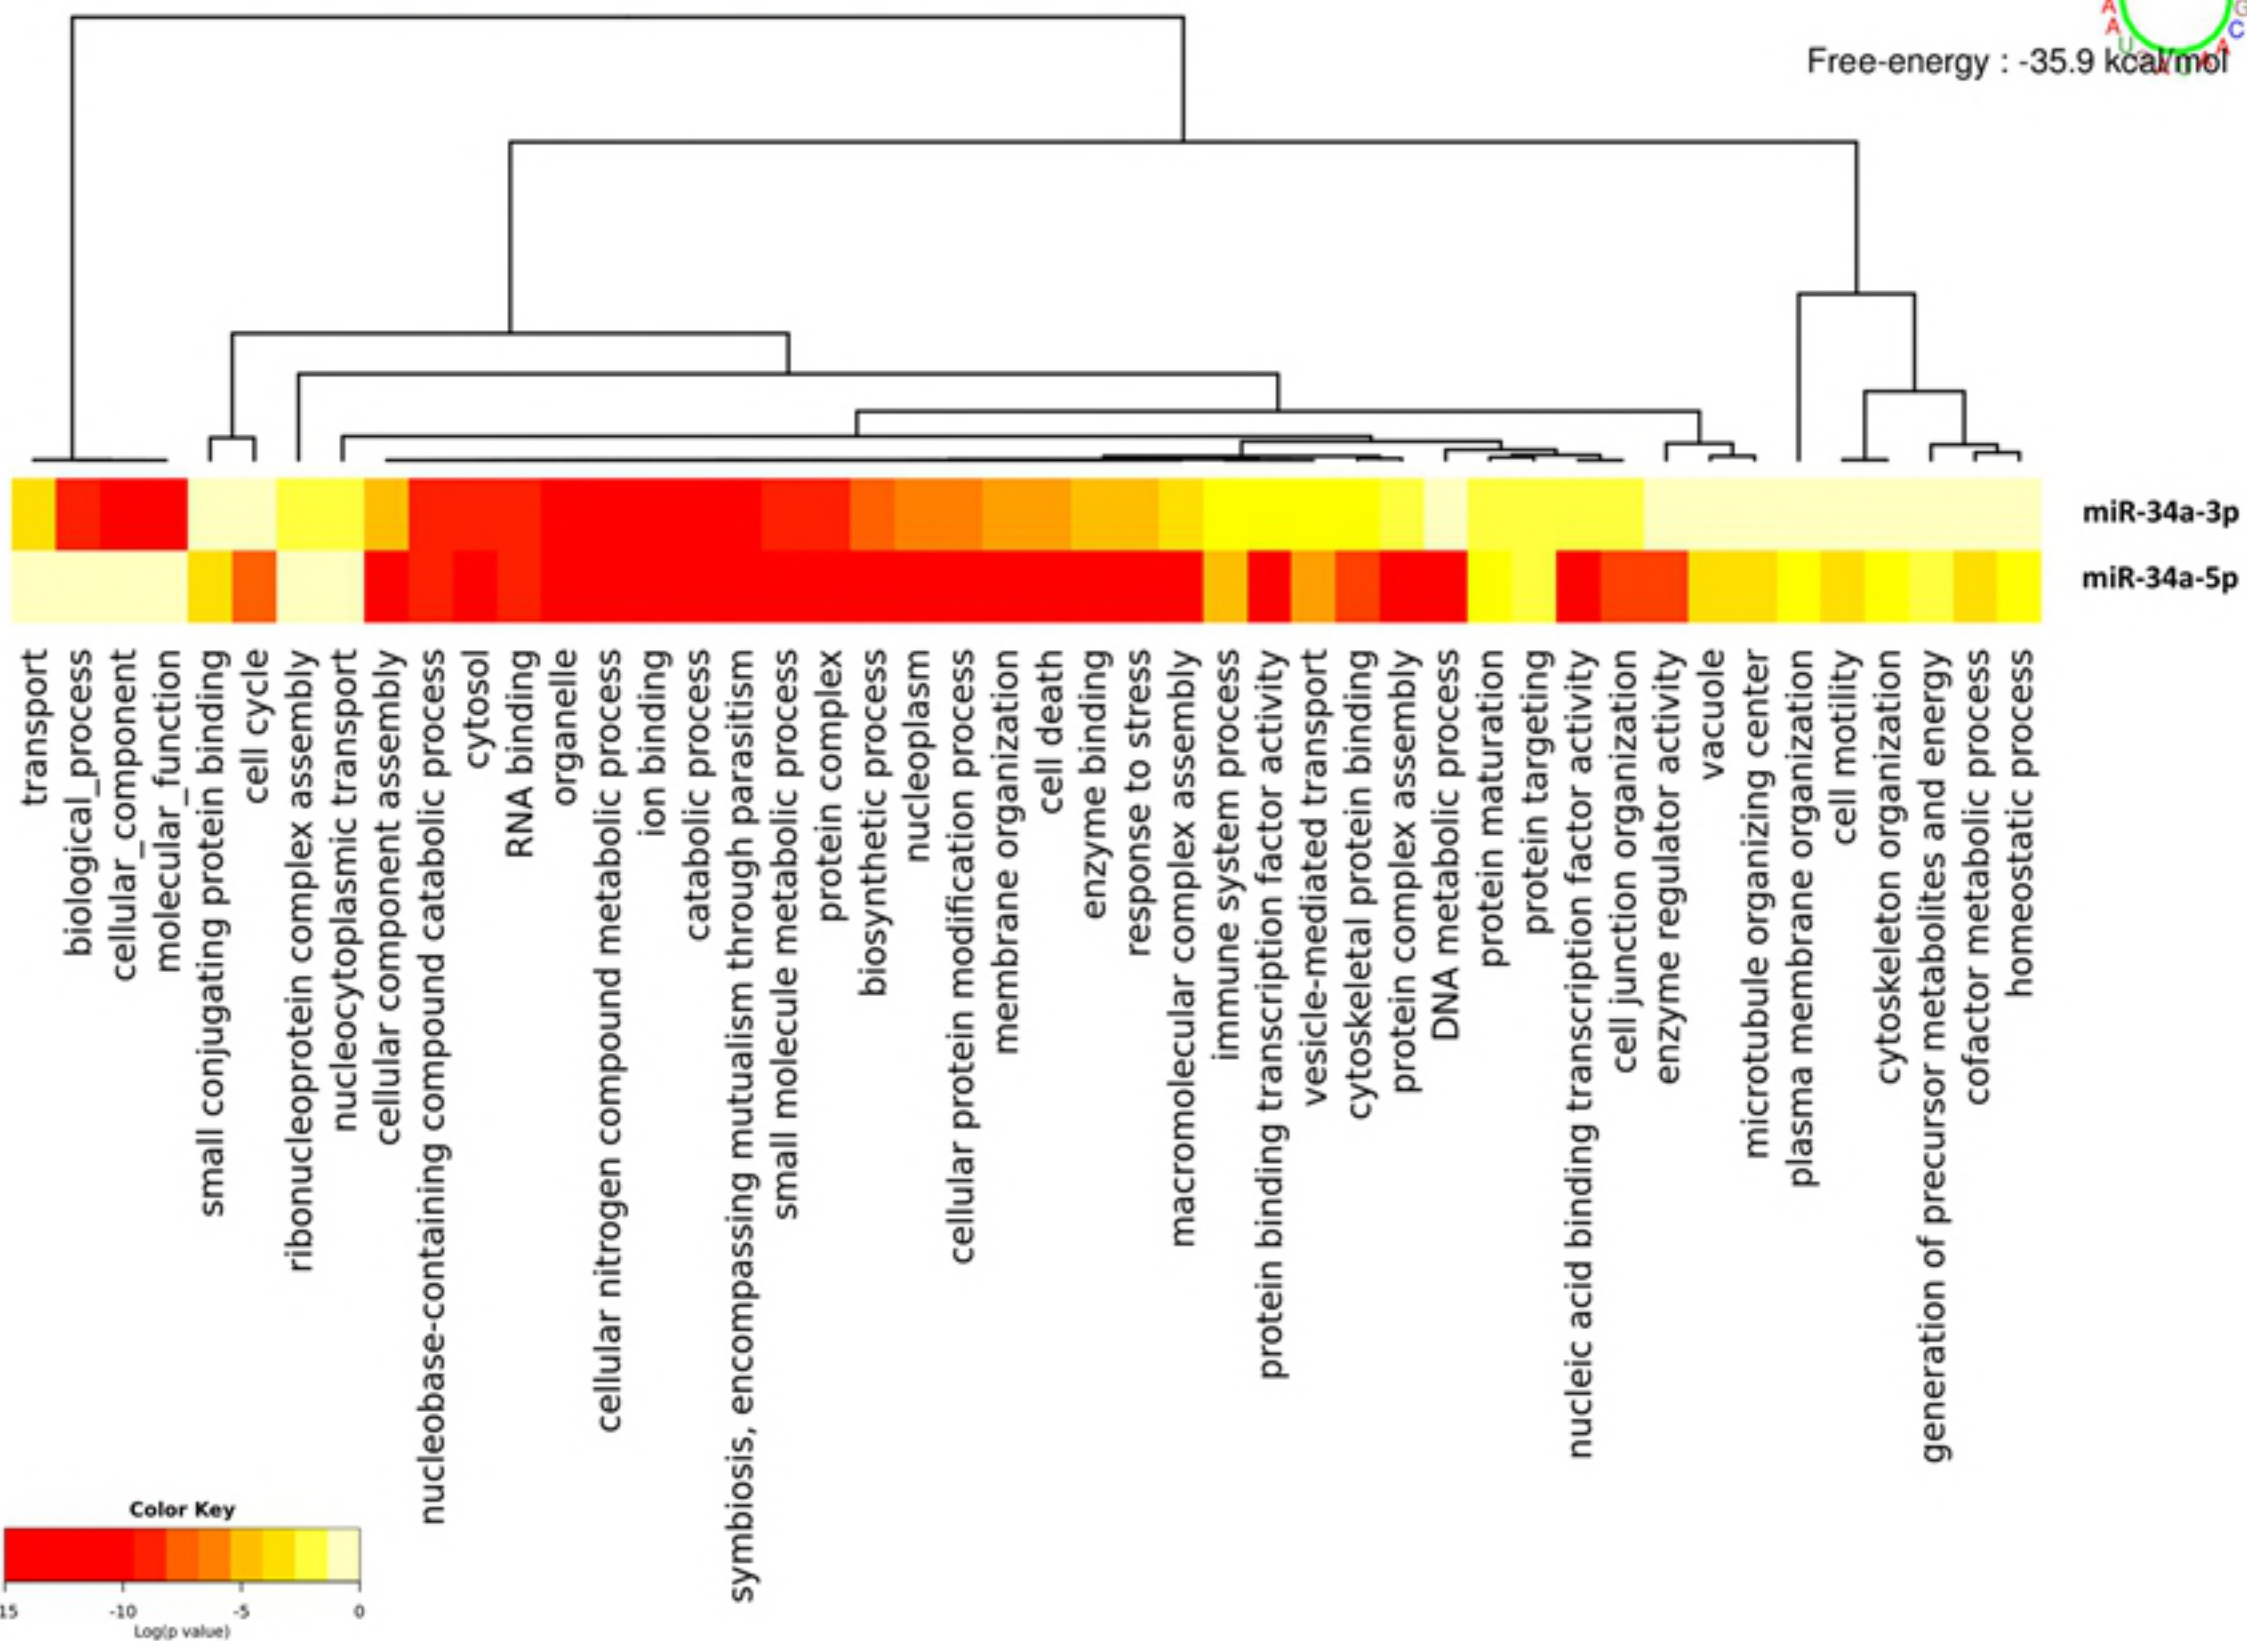

(A)

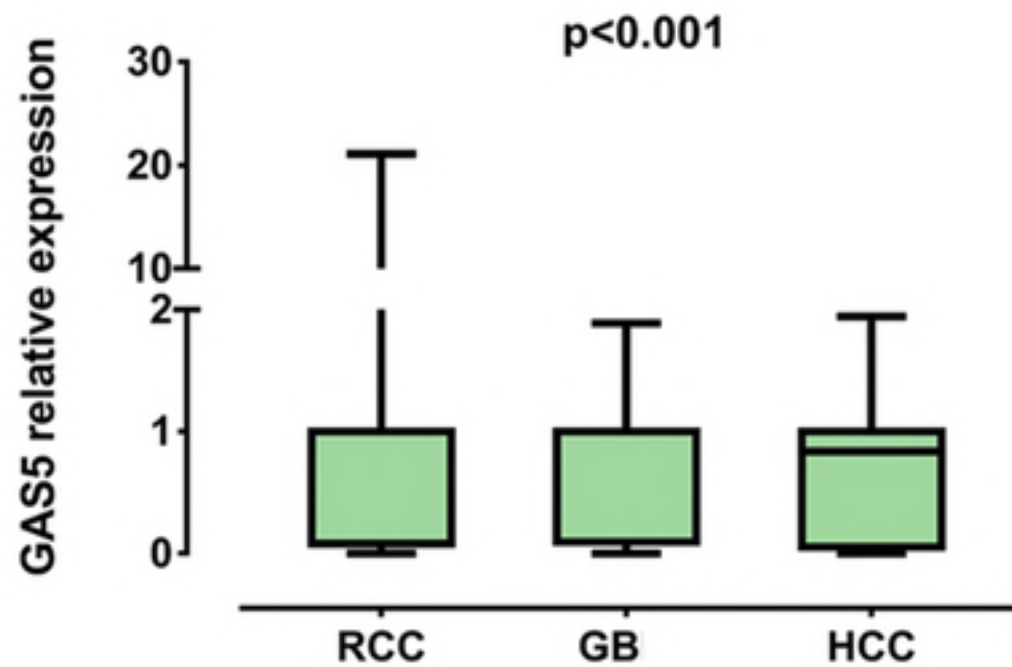

(B)

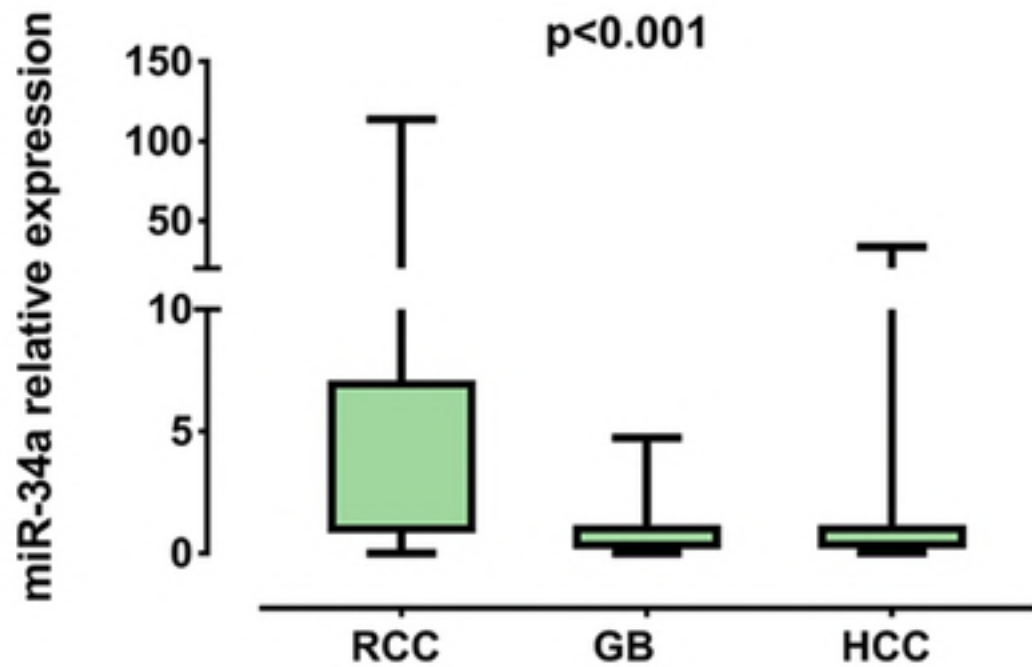

**(A) RCC**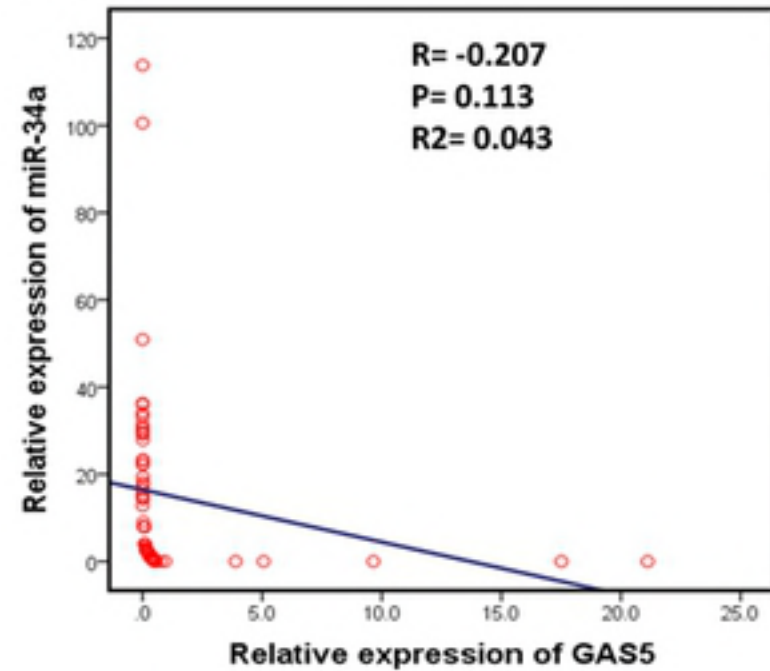**(B) GB**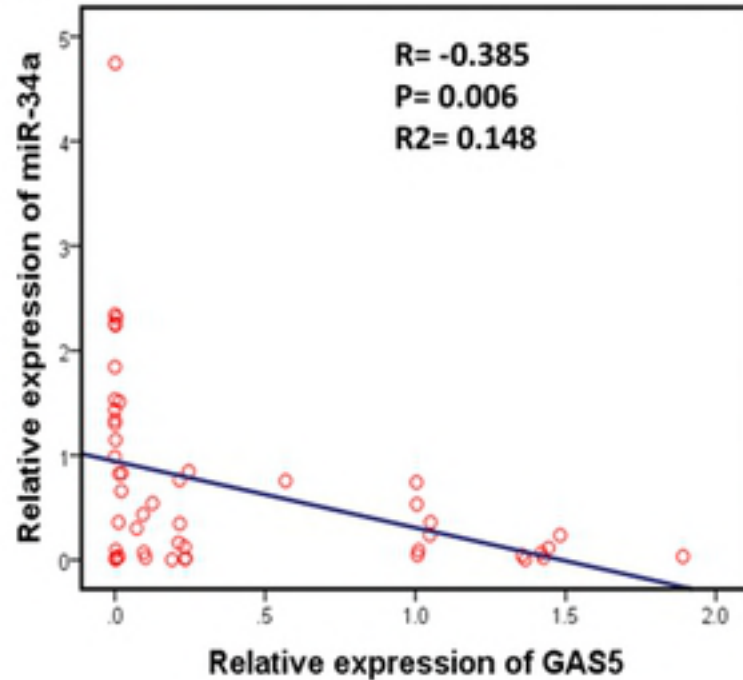**(C) HCC**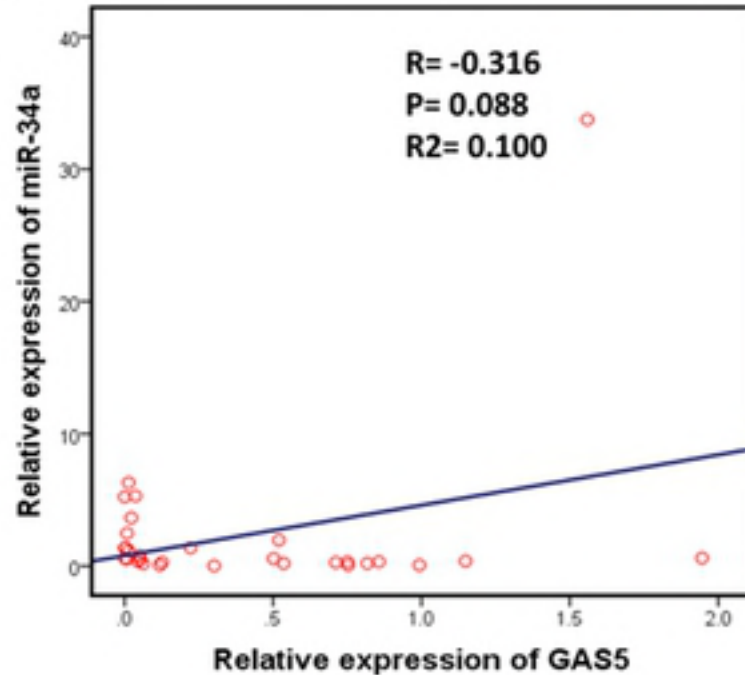

**(A) RCC**

Overall survival in RCC

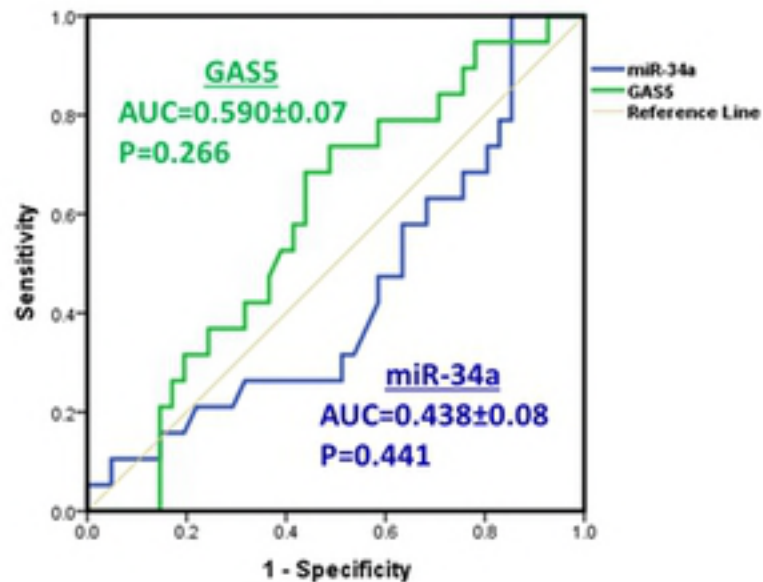**(B) GB**

Overall survival in GB

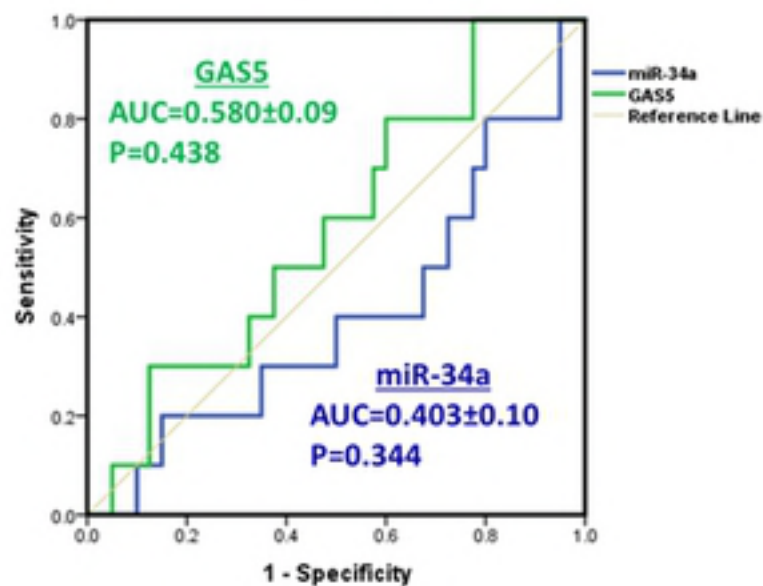**(C) HCC**

CTP class in HCC

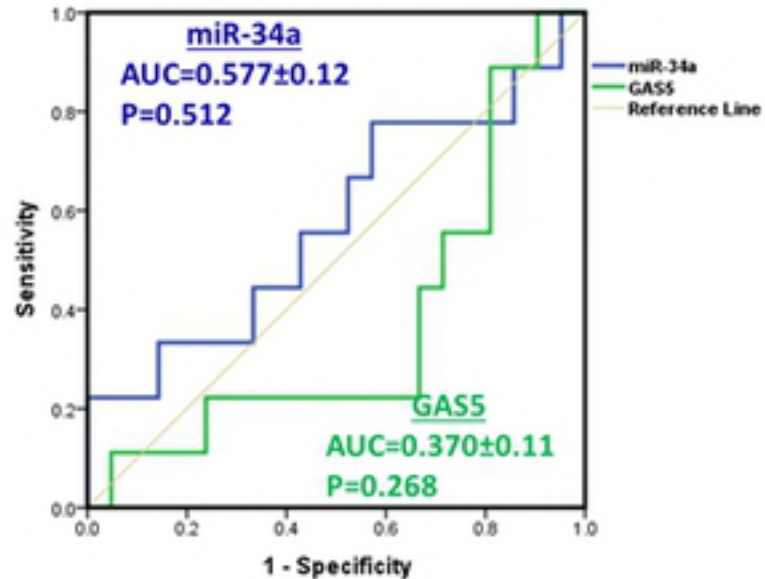



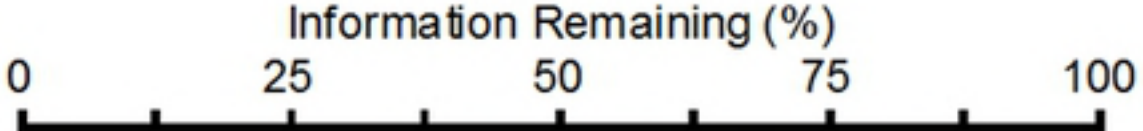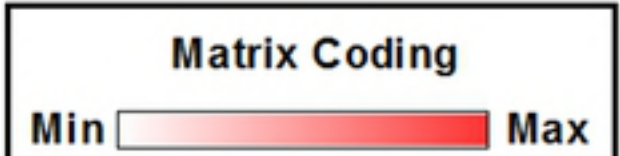

bioRxiv preprint doi: <https://doi.org/10.1101/325175>; this version posted May 17, 2018. The copyright holder for this preprint (which was not certified by peer review) is the author/funder, who has granted bioRxiv a license to display the preprint in perpetuity. It is made available under aCC-BY 4.0 International license.

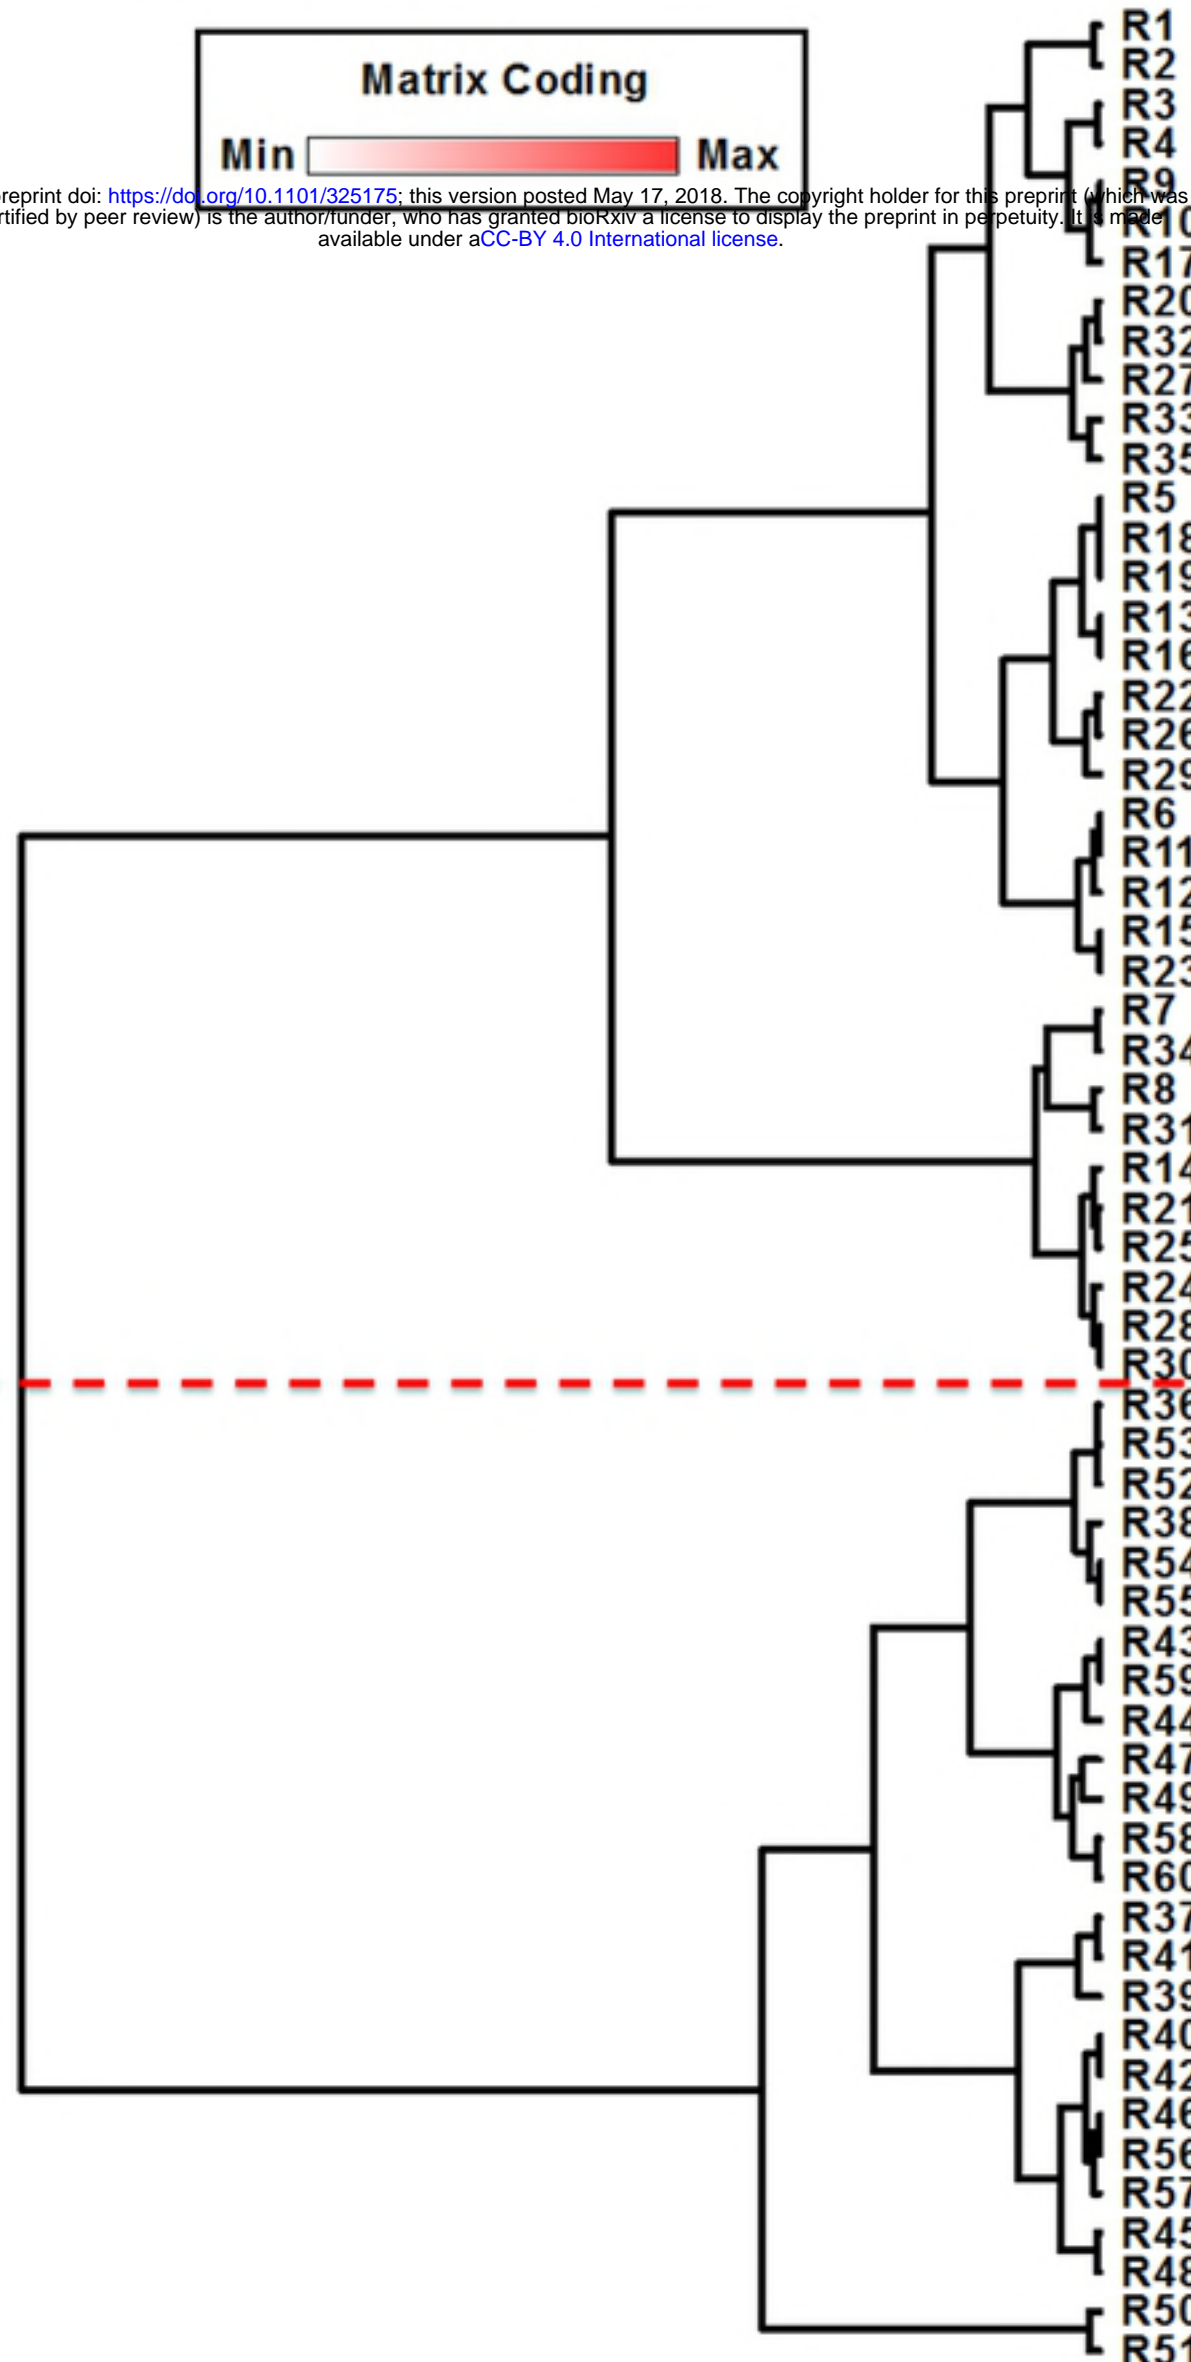

RCC patients

Age  
Grade  
Side  
T  
HPD  
Gender  
PFS  
OS  
miR34a  
GAS5  
LN  
recurr

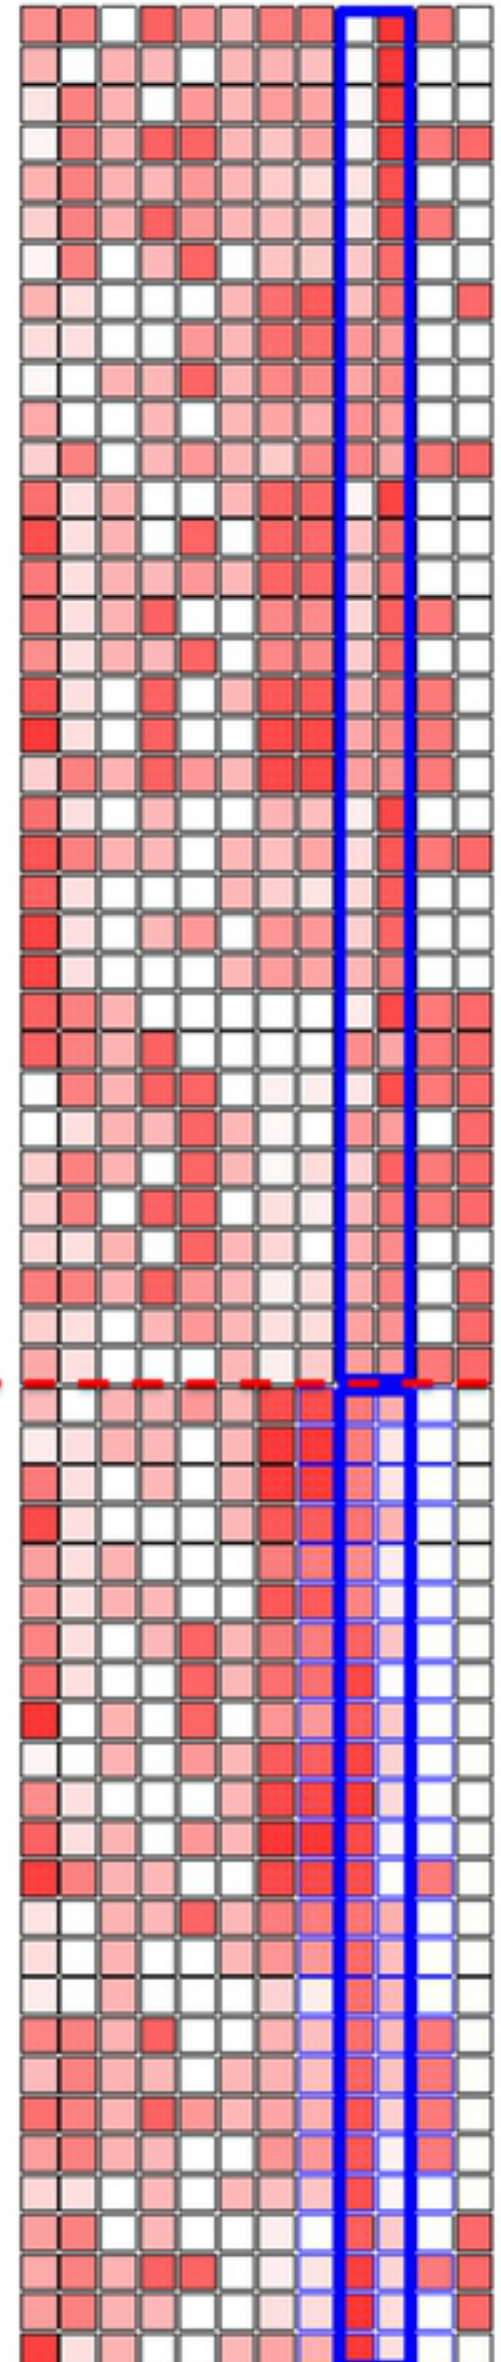

Low miR-34a  
High GAS5

High miR-34a  
Low GAS5

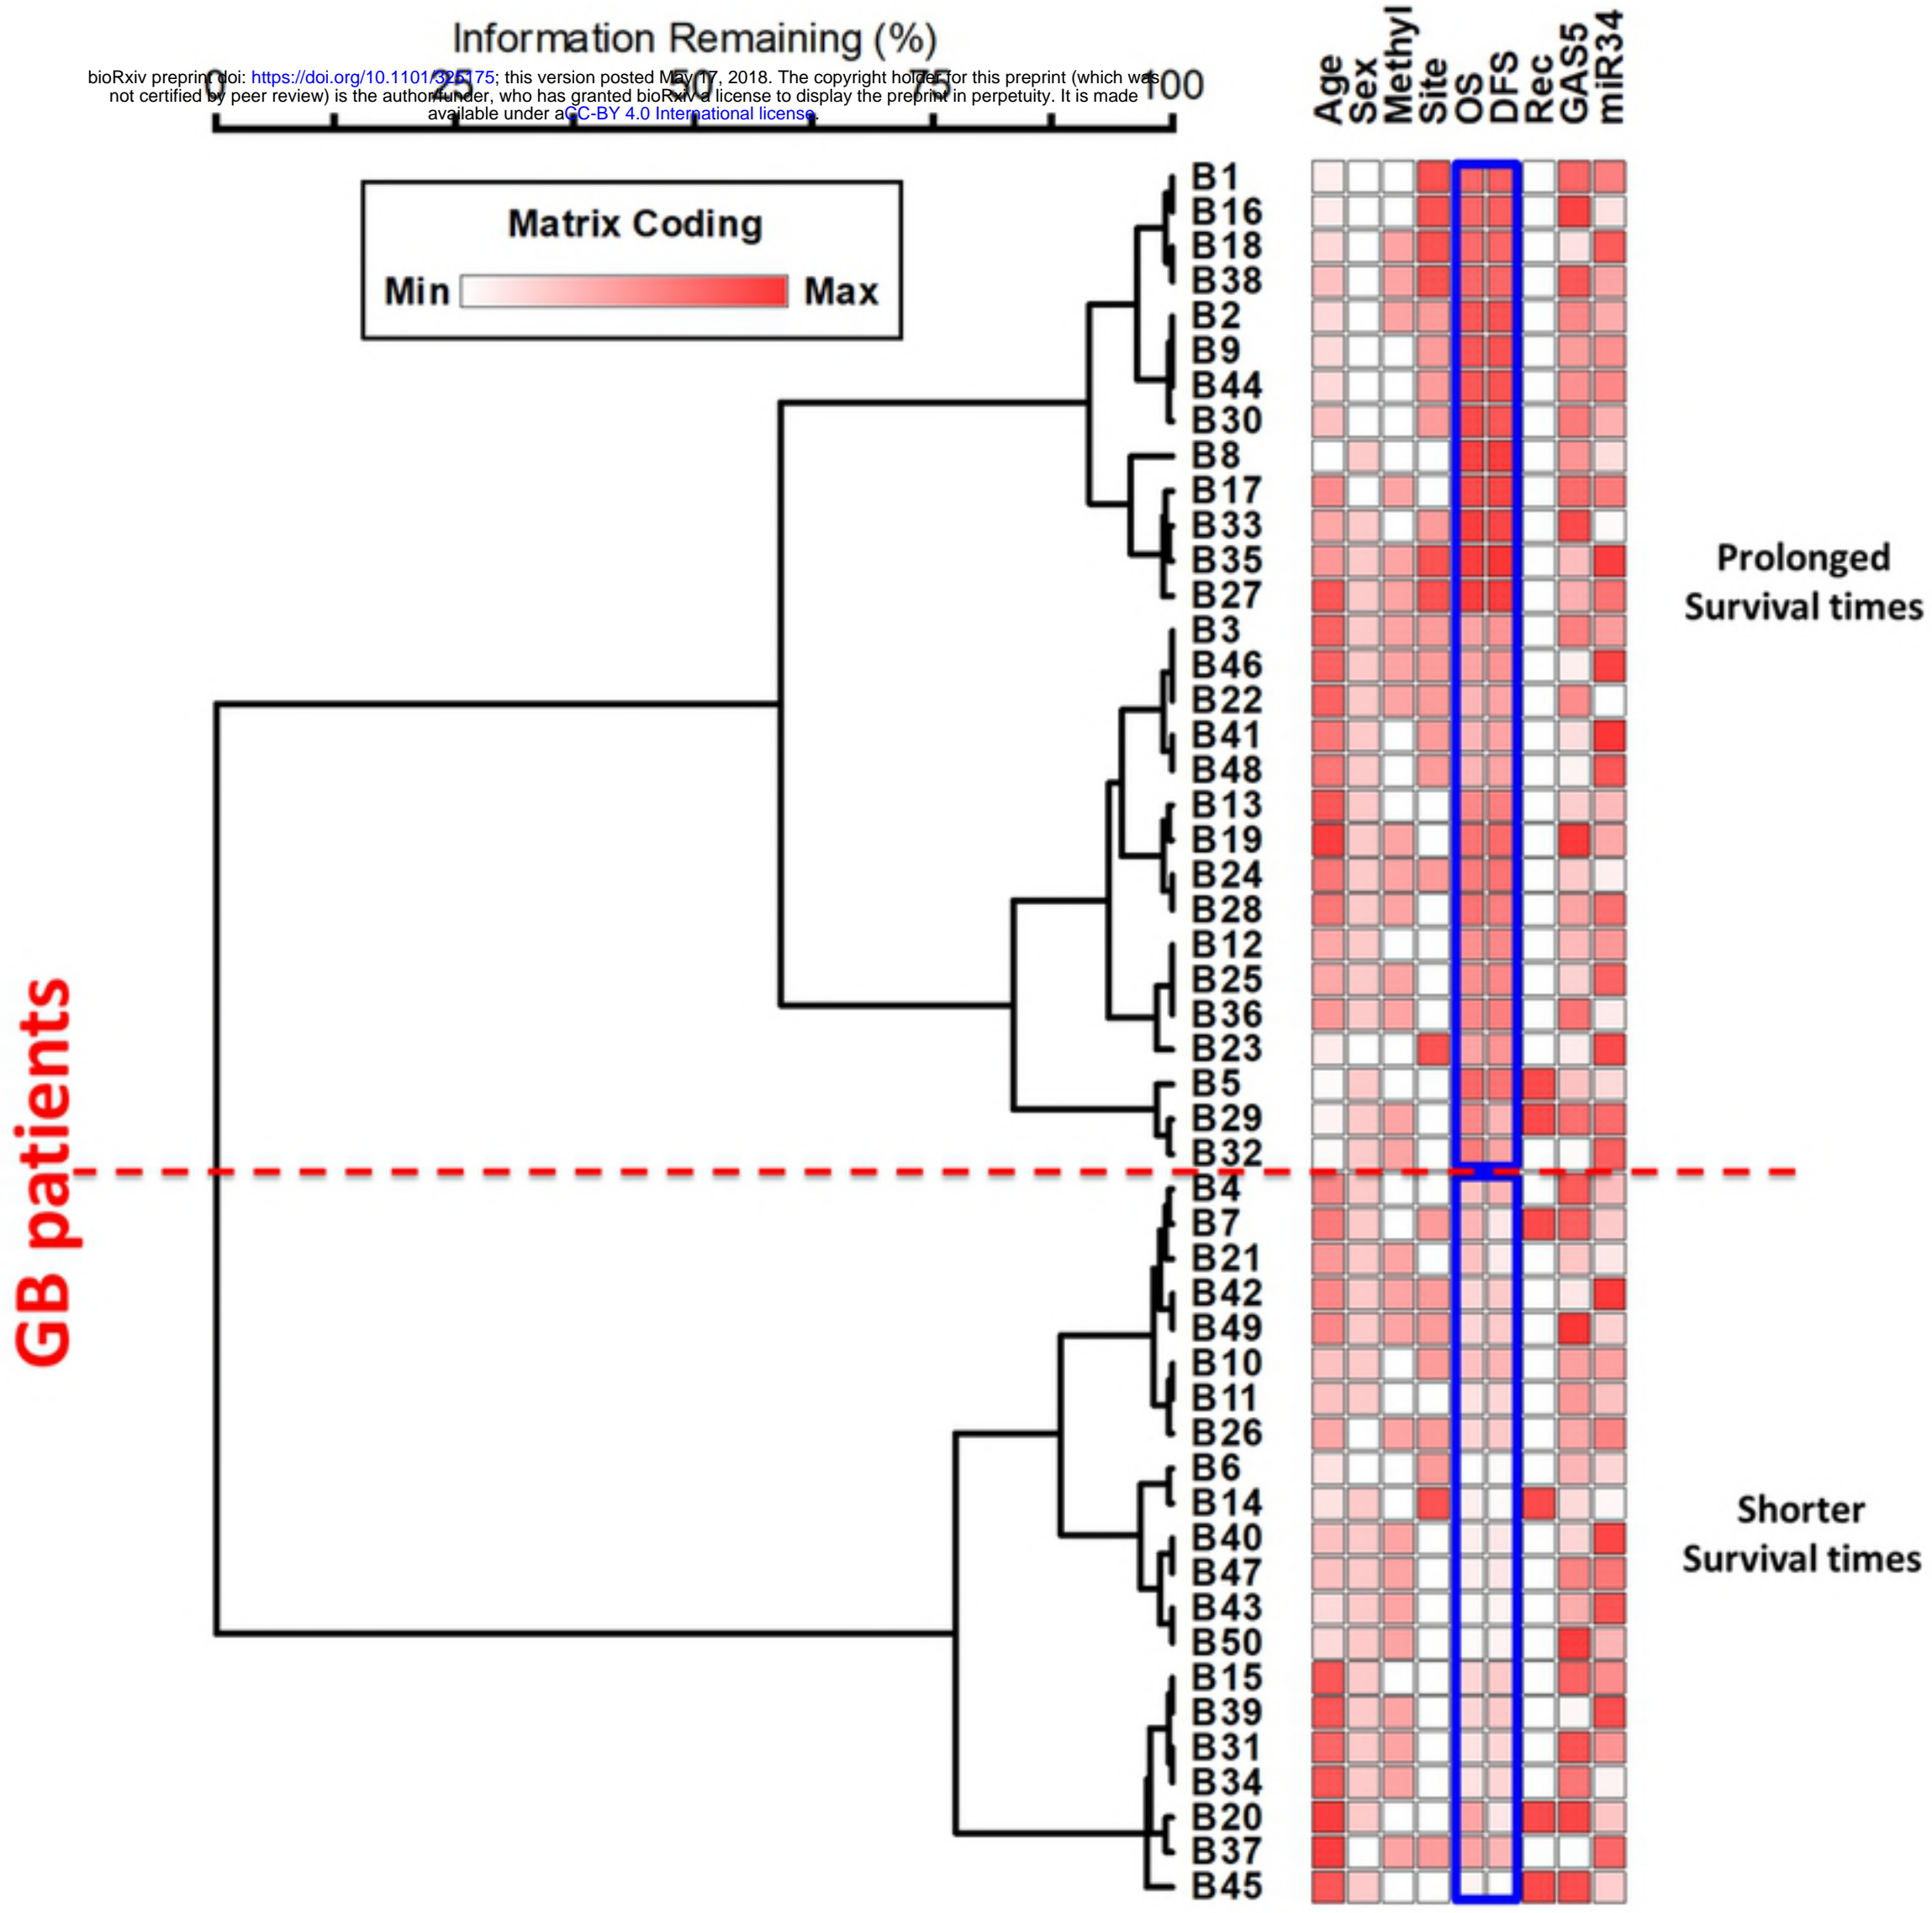

# HCC patients

Information Remaining (%)

0 25 50 75 100

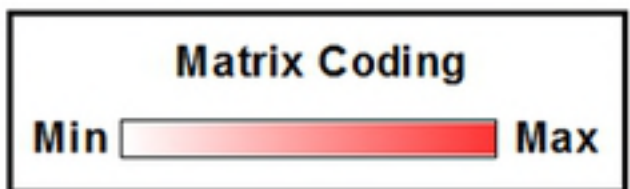

- H1
- H21
- H4
- H22
- H3
- H27
- H6
- H11
- H28
- H29
- H2
- H19
- H23
- H12
- H26
- H18
- H25
- H5
- H24
- H15
- H7
- H14
- H16
- H30
- H20
- H17
- H8
- H13
- H9
- H10

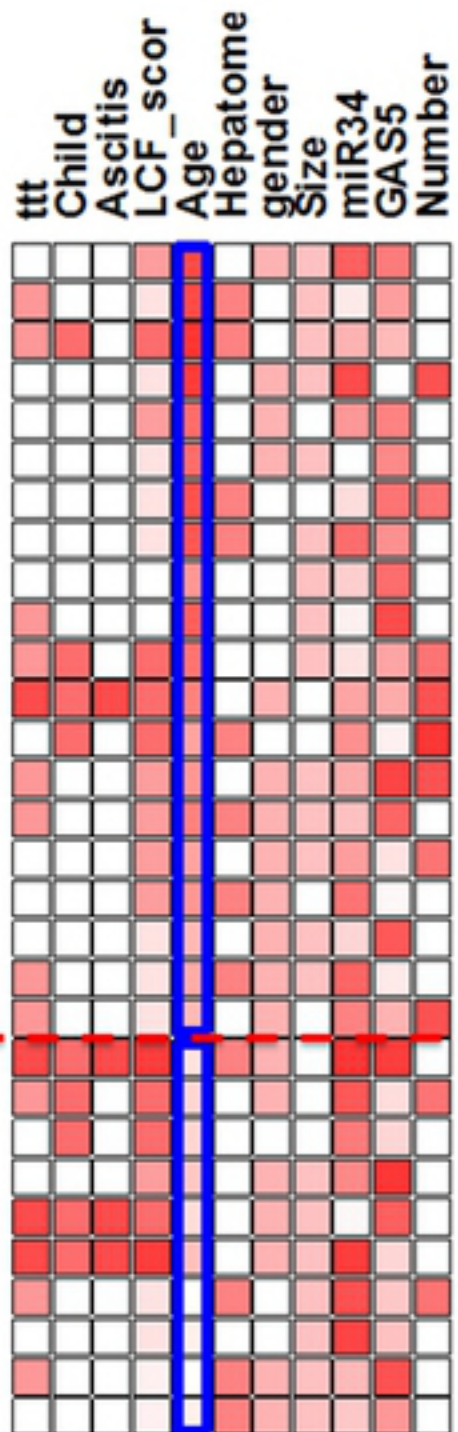

Old age

Young age
